# Supplementary material for: Infrared photodissociation spectroscopic investigation of TMO(CO)n+(TM = Sc, Y, La): testing the 18-electron rule
Source: Royal Society of Chemistry journal article supplement (doi:10.1039/c8cp07748g), 2019-01-01
Supplement: c8cp07748g1.pdf [file c8cp07748g1.pdf]

Electronic Supplementary Information

**Infrared Photodissociation Spectroscopic Investigation of  
TMO(CO)<sub>n</sub><sup>+</sup> (TM = Sc, Y, La): Testing 18-Electron Rule**

Yinjuan Chen<sup>a</sup>, Ke Xin<sup>a</sup>, Jiaye Jin<sup>b</sup>, Wei Li<sup>b</sup>, Qiang Wang<sup>c</sup>, Xuefeng Wang<sup>a\*</sup> and  
Guanjun Wang<sup>b\*</sup>

<sup>a</sup> School of Chemical Science and Engineering, Tongji University, 1239 Siping Road, Shanghai,  
200092 China

<sup>b</sup> Department of Chemistry, Collaborative Innovation Center of Chemistry for Energy Materials,  
Fudan University, Shanghai 200433 China

<sup>c</sup> State Key Laboratory of Coal Conversion, Institute of Coal Chemistry, Chinese Academy of  
Sciences, Taiyuan, Shanxi 030001, PR China

E-mail: [xfwang@tongji.edu.cn](mailto:xfwang@tongji.edu.cn); [gjwang@fudan.edu.cn](mailto:gjwang@fudan.edu.cn)

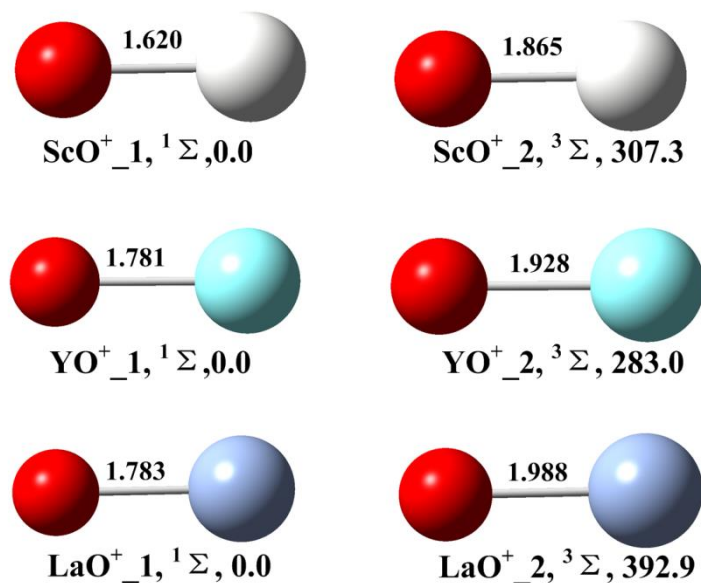

**Fig. S1.** Optimized minimum-energy structures of  $\text{ScO}^+$ ,  $\text{YO}^+$  and  $\text{LaO}^+$  complexes. Relative energies (with ZPE correction) are given in kJ/mol.

**$\text{ScO}^+_1$  Standard orientation**

| Atomic Number | Coordinates (Angstroms) |          |           |
|---------------|-------------------------|----------|-----------|
|               | X                       | Y        | Z         |
| 21            | 0.000000                | 0.000000 | 0.446994  |
| 8             | 0.000000                | 0.000000 | -1.173359 |

**$\text{ScO}^+_2$  Standard orientation**

| Atomic Number | Coordinates (Angstroms) |          |           |
|---------------|-------------------------|----------|-----------|
|               | X                       | Y        | Z         |
| 21            | 0.000000                | 0.000000 | 0.514519  |
| 8             | 0.000000                | 0.000000 | -1.350611 |

**$\text{YO}^+_1$  Standard orientation**

| Atomic Number | Coordinates (Angstroms) |          |           |
|---------------|-------------------------|----------|-----------|
|               | X                       | Y        | Z         |
| 39            | 0.000000                | 0.000000 | 0.303484  |
| 8             | 0.000000                | 0.000000 | -1.479482 |

**$\text{YO}^+_2$  Standard orientation**

| Atomic Number | Coordinates (Angstroms) |   |   |
|---------------|-------------------------|---|---|
|               | X                       | Y | Z |

|    |          |          |           |
|----|----------|----------|-----------|
| 39 | 0.000000 | 0.000000 | 0.328149  |
| 8  | 0.000000 | 0.000000 | -1.599724 |

### LaO<sup>+</sup>\_1 Standard orientation

| Atomic Number | Coordinates (Angstroms) |          |           |
|---------------|-------------------------|----------|-----------|
|               | X                       | Y        | Z         |
| 57            | 0.000000                | 0.000000 | 0.219169  |
| 8             | 0.000000                | 0.000000 | -1.561580 |

### LaO<sup>+</sup>\_2 Standard orientation

| Atomic Number | Coordinates (Angstroms) |          |           |
|---------------|-------------------------|----------|-----------|
|               | X                       | Y        | Z         |
| 57            | 0.000000                | 0.000000 | 0.244684  |
| 8             | 0.000000                | 0.000000 | -1.743376 |

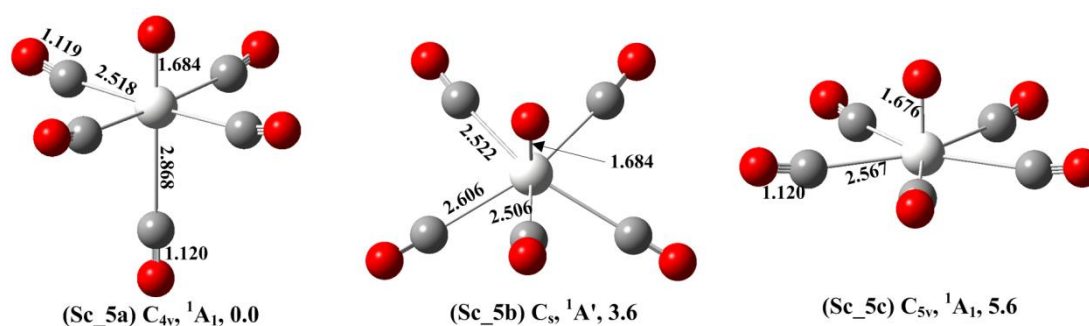

**Fig. S2.** Optimized structures of the minimum-energy isomers of the ScO(CO)<sub>5</sub><sup>+</sup> complexes. Relative energies (with ZPE correction) are given in kJ/mol.

### ScO(CO)<sub>5</sub><sup>+</sup> (Sc\_5a) Standard orientation

| Atomic Number | Coordinates (Angstroms) |           |           |
|---------------|-------------------------|-----------|-----------|
|               | X                       | Y         | Z         |
| 21            | 0.000000                | 0.000000  | 0.245468  |
| 6             | 0.000000                | 2.517044  | 0.304806  |
| 6             | -2.517044               | 0.000000  | 0.304806  |
| 6             | 2.517044                | 0.000000  | 0.304806  |
| 6             | 0.000000                | -2.517044 | 0.304806  |
| 6             | 0.000000                | 0.000000  | -2.622487 |
| 8             | -3.607753               | 0.000000  | 0.555305  |
| 8             | 0.000000                | 3.607753  | 0.555305  |

|   |          |           |           |
|---|----------|-----------|-----------|
| 8 | 0.000000 | 0.000000  | -3.742671 |
| 8 | 3.607753 | 0.000000  | 0.555305  |
| 8 | 0.000000 | -3.607753 | 0.555305  |
| 8 | 0.000000 | 0.000000  | 1.929548  |

---

**Frequencies    IR intensity**

---

|           |          |
|-----------|----------|
| 20.4400   | 1.8137   |
| 20.4400   | 1.8137   |
| 25.3343   | 0.0000   |
| 31.7183   | 1.1015   |
| 31.7183   | 1.1015   |
| 38.0939   | 0.0000   |
| 47.8811   | 0.1445   |
| 69.5270   | 39.9259  |
| 69.5271   | 39.9259  |
| 114.0937  | 4.0552   |
| 157.2026  | 0.0210   |
| 157.2026  | 0.0210   |
| 160.5550  | 0.0000   |
| 170.6103  | 0.2524   |
| 192.7161  | 0.0000   |
| 203.5890  | 3.1071   |
| 203.5890  | 3.1071   |
| 233.7241  | 0.0000   |
| 249.0156  | 10.2388  |
| 249.0156  | 10.2388  |
| 270.7959  | 0.0000   |
| 291.2427  | 38.0084  |
| 291.2427  | 38.0084  |
| 296.5048  | 2.5680   |
| 958.7078  | 135.9878 |
| 2275.7424 | 71.4833  |
| 2284.0513 | 0.0000   |
| 2284.1353 | 193.5023 |
| 2284.1353 | 193.5023 |
| 2289.6567 | 0.2772   |

---

**ScO(CO)<sub>5</sub><sup>+</sup> (Sc\_5b)**

**Standard orientation**

| Atomic<br>Number | Coordinates (Angstroms) |   |   |
|------------------|-------------------------|---|---|
|                  | X                       | Y | Z |

---

|    |           |           |           |
|----|-----------|-----------|-----------|
| 21 | 0.035715  | 0.049400  | 0.000000  |
| 6  | -0.924188 | 0.892919  | 2.271203  |
| 6  | 2.012475  | 0.055212  | 1.565392  |
| 6  | 2.012475  | 0.055212  | -1.565392 |
| 6  | -0.924188 | 0.892919  | -2.271203 |
| 6  | -2.341797 | -0.743460 | 0.000000  |
| 8  | 0.228896  | -1.623608 | 0.000000  |
| 8  | -1.347859 | 1.207152  | 3.258184  |
| 8  | -3.258168 | -1.389063 | 0.000000  |
| 8  | -1.347859 | 1.207152  | -3.258184 |
| 8  | 2.877579  | -0.197954 | -2.229909 |
| 8  | 2.877579  | -0.197954 | 2.229909  |

---

**Frequencies    IR intensity**

---

|           |          |
|-----------|----------|
| 4.1743    | 0.0368   |
| 17.5027   | 0.0560   |
| 53.8055   | 0.3159   |
| 57.5689   | 2.0700   |
| 58.0560   | 1.1821   |
| 58.7968   | 0.0058   |
| 61.6660   | 0.1603   |
| 83.1700   | 24.3432  |
| 112.5030  | 37.1425  |
| 140.0528  | 0.9976   |
| 141.9559  | 1.2941   |
| 159.7269  | 0.1285   |
| 188.1515  | 0.0001   |
| 198.9220  | 5.7021   |
| 213.0630  | 0.9126   |
| 216.5568  | 3.8025   |
| 220.3664  | 8.2365   |
| 265.0351  | 6.0053   |
| 273.1223  | 0.0629   |
| 289.6423  | 6.5763   |
| 291.4011  | 26.3859  |
| 298.4594  | 16.8546  |
| 309.0329  | 5.7133   |
| 323.0887  | 45.4719  |
| 957.4709  | 115.3254 |
| 2264.7080 | 173.9930 |
| 2275.0041 | 70.4783  |
| 2278.4586 | 132.8011 |

---

|           |          |
|-----------|----------|
| 2284.9310 | 129.0883 |
| 2287.0148 | 18.6114  |

**ScO(CO)<sub>5</sub><sup>+</sup> (Sc\_5c)      Standard orientation**

| Atomic Number | Coordinates (Angstroms) |           |           |
|---------------|-------------------------|-----------|-----------|
|               | X                       | Y         | Z         |
| 21            | 0.000000                | 0.000000  | 0.160257  |
| 6             | 0.000000                | 2.565739  | 0.222812  |
| 6             | -2.440163               | 0.792857  | 0.222812  |
| 6             | -1.508104               | -2.075727 | 0.222812  |
| 6             | 1.508104                | -2.075727 | 0.222812  |
| 6             | 2.440163                | 0.792857  | 0.222812  |
| 8             | 0.000000                | 0.000000  | -1.515439 |
| 8             | 0.000000                | 3.672313  | 0.051844  |
| 8             | 3.492577                | 1.134807  | 0.051844  |
| 8             | 2.158531                | -2.970963 | 0.051844  |
| 8             | -2.158531               | -2.970963 | 0.051844  |
| 8             | -3.492577               | 1.134807  | 0.051844  |

**Frequencies      IR intensity**

|          |         |
|----------|---------|
| -16.7830 | 0.0000  |
| -16.6711 | 0.0001  |
| 54.9548  | 0.3465  |
| 60.7299  | 0.8214  |
| 60.8418  | 0.8339  |
| 66.8247  | 0.0001  |
| 67.0022  | 0.0003  |
| 87.8843  | 29.4924 |
| 88.3284  | 29.3493 |
| 127.8961 | 0.0017  |
| 128.1021 | 0.0000  |
| 152.6905 | 0.0000  |
| 186.8796 | 0.0028  |
| 213.1447 | 14.1279 |
| 213.2622 | 13.8991 |
| 236.1905 | 0.0004  |
| 236.4421 | 0.0001  |
| 254.0169 | 0.1603  |
| 254.1771 | 0.2023  |
| 278.6668 | 5.6427  |
| 295.1650 | 46.9059 |

|           |          |
|-----------|----------|
| 295.4286  | 46.9209  |
| 317.7825  | 0.0001   |
| 318.0337  | 0.0001   |
| 972.2613  | 108.1715 |
| 2275.9235 | 0.0391   |
| 2275.9577 | 0.0001   |
| 2278.2499 | 239.3639 |
| 2278.2516 | 239.3523 |
| 2284.1983 | 0.0189   |

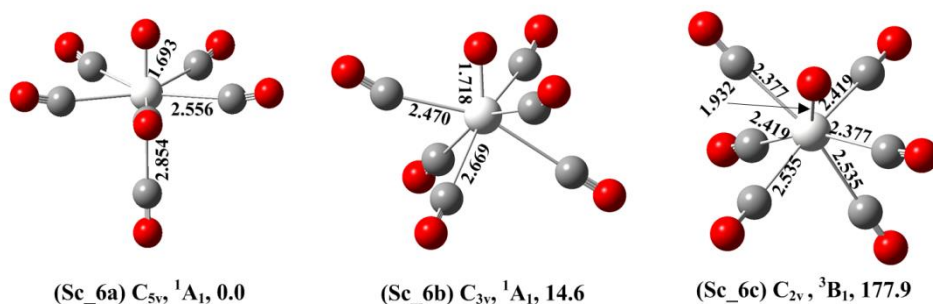

**Fig. S3.** Optimized structures of the minimum-energy isomers of the  $\text{ScO}(\text{CO})_6^+$  complexes. Relative energies (with ZPE correction) are given in kJ/mol.

**$\text{ScO}(\text{CO})_6^+$  (Sc\_6a) Standard orientation**

| Atomic Number | Coordinates (Angstroms) |           |           |
|---------------|-------------------------|-----------|-----------|
|               | X                       | Y         | Z         |
| 21            | 0.000000                | 0.000000  | 0.171266  |
| 6             | 0.000000                | 2.554548  | 0.250179  |
| 6             | -2.429520               | 0.789399  | 0.250179  |
| 6             | 2.429520                | 0.789399  | 0.250179  |
| 6             | -1.501526               | -2.066673 | 0.250179  |
| 6             | 1.501526                | -2.066673 | 0.250179  |
| 8             | -3.465334               | 1.125955  | 0.512610  |
| 8             | 0.000000                | 3.643667  | 0.512610  |
| 8             | 2.141694                | -2.947789 | 0.512610  |
| 8             | 3.465334                | 1.125955  | 0.512610  |
| 8             | -2.141694               | -2.947789 | 0.512610  |
| 8             | 0.000000                | 0.000000  | 1.864586  |
| 6             | 0.000000                | 0.000000  | -2.682829 |
| 8             | 0.000000                | 0.000000  | -3.803257 |

| <b>Frequencies</b> | <b>IR intensity</b> |
|--------------------|---------------------|
| 2.8307             | 0.0001              |
| 5.3056             | 0.0006              |
| 23.7953            | 1.5228              |
| 23.9805            | 1.4743              |
| 53.6454            | 0.1741              |
| 59.5348            | 2.2112              |
| 59.8578            | 2.1829              |
| 66.0910            | 0.0012              |
| 66.2952            | 0.0023              |
| 90.2782            | 35.0300             |
| 91.1115            | 35.0299             |
| 122.5887           | 2.8336              |
| 133.5425           | 0.0003              |
| 133.9279           | 0.0017              |
| 154.2702           | 0.0143              |
| 154.3272           | 0.0119              |
| 157.7500           | 0.5805              |
| 182.1511           | 0.0029              |
| 216.5654           | 11.5347             |
| 216.6895           | 11.7295             |
| 247.0622           | 0.0023              |
| 247.7925           | 0.0024              |
| 257.2822           | 0.0383              |
| 257.3792           | 0.0389              |
| 292.6843           | 4.4657              |
| 299.0486           | 42.1131             |
| 299.1612           | 42.2332             |
| 314.4527           | 0.0007              |
| 314.6843           | 0.0021              |
| 929.7439           | 112.0191            |
| 2242.8409          | 0.0986              |
| 2242.9266          | 0.4669              |
| 2244.8335          | 260.0325            |
| 2244.9547          | 259.5831            |
| 2248.5058          | 68.4416             |
| 2252.5932          | 3.8082              |

**ScO(CO)<sub>6</sub><sup>+</sup> (Sc\_6b) Standard orientation**

| Atomic<br>Number | Coordinates (Angstroms) |   |   |
|------------------|-------------------------|---|---|
|                  | X                       | Y | Z |



|    |           |           |           |
|----|-----------|-----------|-----------|
| 21 | 0.000000  | 0.000000  | 0.220739  |
| 6  | 0.000000  | 2.374619  | 0.900305  |
| 6  | 2.056480  | -1.187309 | 0.900305  |
| 6  | -2.056480 | -1.187309 | 0.900305  |
| 6  | -1.859035 | 1.073315  | -1.364649 |
| 6  | 1.859035  | 1.073315  | -1.364649 |
| 6  | 0.000000  | -2.146629 | -1.364649 |
| 8  | 0.000000  | 3.313050  | 1.515418  |
| 8  | -2.653750 | 1.532143  | -2.006480 |
| 8  | 0.000000  | 0.000000  | 1.938518  |
| 8  | -2.869185 | -1.656525 | 1.515418  |
| 8  | 0.000000  | -3.064287 | -2.006480 |
| 8  | 2.869185  | -1.656525 | 1.515418  |
| 8  | 2.653750  | 1.532143  | -2.006480 |

| <b>Frequencies</b> | <b>IR intensity</b> |
|--------------------|---------------------|
| 11.1533            | 0.2368              |
| 12.7319            | 0.2451              |
| 38.8835            | 0.0711              |
| 51.1879            | 0.0005              |
| 53.1381            | 0.0051              |
| 53.2392            | 0.0014              |
| 61.7959            | 2.0317              |
| 62.0979            | 1.9490              |
| 68.3562            | 0.6638              |
| 110.5856           | 12.3137             |
| 110.6710           | 12.2406             |
| 135.0040           | 1.5437              |
| 138.5661           | 22.3060             |
| 138.9527           | 22.4025             |
| 171.5906           | 1.4841              |
| 180.9837           | 0.2335              |
| 181.5621           | 0.2500              |
| 185.6773           | 0.0000              |
| 210.4081           | 4.2856              |
| 210.5654           | 4.3987              |
| 214.0658           | 1.0358              |
| 266.1887           | 6.1828              |
| 266.6802           | 5.8784              |
| 279.2059           | 0.0046              |
| 288.7697           | 9.8548              |
| 288.7716           | 9.8919              |

|           |          |
|-----------|----------|
| 347.4602  | 0.4092   |
| 353.8748  | 48.7566  |
| 354.1651  | 48.4333  |
| 902.7169  | 122.5255 |
| 2250.8068 | 232.3454 |
| 2250.9406 | 232.4312 |
| 2259.0966 | 70.9893  |
| 2276.8820 | 81.9853  |
| 2277.0782 | 81.8020  |
| 2279.9028 | 75.5262  |

| <b>ScO(CO)<sub>6</sub><sup>+</sup> (Sc_6c)</b> |                         | <b>Standard orientation</b> |           |  |
|------------------------------------------------|-------------------------|-----------------------------|-----------|--|
| Atomic Number                                  | Coordinates (Angstroms) |                             |           |  |
|                                                | X                       | Y                           | Z         |  |
| 21                                             | 0.000000                | 0.000000                    | 0.189835  |  |
| 6                                              | 0.000000                | 1.657354                    | -1.727958 |  |
| 6                                              | 0.000000                | 2.208858                    | 1.177058  |  |
| 6                                              | 2.363425                | 0.000000                    | -0.066683 |  |
| 6                                              | 0.000000                | -1.657354                   | -1.727958 |  |
| 6                                              | 0.000000                | -2.208858                   | 1.177058  |  |
| 8                                              | 0.000000                | 2.433371                    | -2.537945 |  |
| 8                                              | 0.000000                | 3.151901                    | 1.787884  |  |
| 8                                              | 0.000000                | -3.151901                   | 1.787884  |  |
| 8                                              | 3.487811                | 0.000000                    | -0.097072 |  |
| 8                                              | 0.000000                | -2.433371                   | -2.537945 |  |
| 8                                              | 0.000000                | 0.000000                    | 2.122324  |  |
| 6                                              | -2.363425               | 0.000000                    | -0.066683 |  |
| 8                                              | -3.487811               | 0.000000                    | -0.097072 |  |

| <b>Frequencies</b> | <b>IR intensity</b> |
|--------------------|---------------------|
| 23.9127            | 0.0000              |
| 36.0053            | 0.3502              |
| 44.2824            | 1.3281              |
| 45.5575            | 0.0322              |
| 51.5639            | 0.0000              |
| 55.9497            | 1.6626              |
| 57.9166            | 0.4758              |
| 66.7349            | 0.4234              |
| 67.6126            | 2.3074              |
| 80.9419            | 14.1949             |
| 84.9714            | 13.7141             |

|           |           |
|-----------|-----------|
| 148.6338  | 2.4765    |
| 167.5563  | 0.0350    |
| 185.5861  | 0.8951    |
| 212.7617  | 0.0010    |
| 214.9167  | 4.4589    |
| 227.1934  | 0.0000    |
| 237.9258  | 1.4899    |
| 245.5570  | 0.0000    |
| 248.4489  | 0.2818    |
| 262.3078  | 1.6509    |
| 268.7832  | 2.1311    |
| 286.2455  | 3.0267    |
| 288.7017  | 1.9706    |
| 289.2586  | 0.0000    |
| 316.6893  | 10.3330   |
| 330.1249  | 20.2546   |
| 340.0404  | 0.0000    |
| 343.8469  | 7.8120    |
| 612.2747  | 57.7573   |
| 2184.7210 | 1421.8175 |
| 2205.0240 | 75.4610   |
| 2209.3522 | 709.3556  |
| 2224.6884 | 378.8470  |
| 2226.9620 | 298.2939  |
| 2256.6074 | 89.3311   |

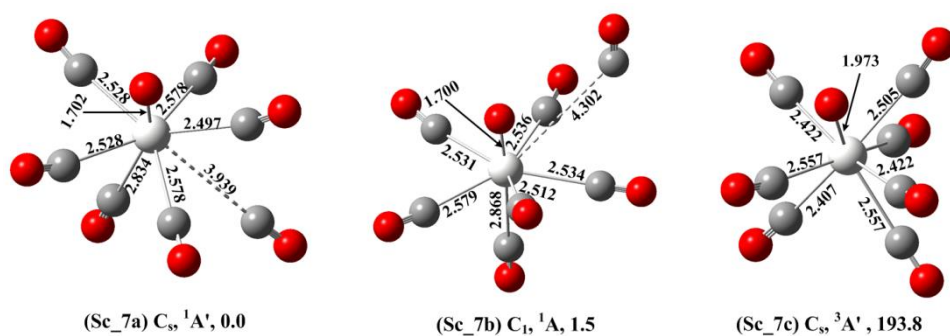

**Fig. S4.** Optimized structures of the minimum-energy isomers of the ScO(CO)<sub>7</sub><sup>+</sup> complexes. Relative energies (with ZPE correction) are given in kJ/mol.

**ScO(CO)<sub>7</sub><sup>+</sup> (Sc\_7a) Standard orientation**

| Atomic Number | Coordinates (Angstroms) |   |   |
|---------------|-------------------------|---|---|
|               | X                       | Y | Z |

|    |           |           |           |
|----|-----------|-----------|-----------|
| 21 | -0.343056 | 0.438151  | 0.000000  |
| 6  | -0.306787 | -0.577376 | 2.369738  |
| 6  | 0.278285  | 2.326581  | 1.560928  |
| 6  | -2.097831 | -1.337653 | 0.000000  |
| 6  | 0.278285  | 2.326581  | -1.560928 |
| 6  | -0.306787 | -0.577376 | -2.369738 |
| 8  | 0.257469  | 3.255581  | 2.188369  |
| 8  | -0.370972 | -0.989189 | 3.409177  |
| 8  | -0.370972 | -0.989189 | -3.409177 |
| 8  | -3.086698 | -1.867872 | 0.000000  |
| 8  | 0.257469  | 3.255581  | -2.188369 |
| 8  | -1.794731 | 1.327564  | 0.000000  |
| 6  | 2.466006  | 0.065791  | 0.000000  |
| 8  | 3.578730  | -0.069392 | 0.000000  |
| 6  | 1.071187  | -3.238306 | 0.000000  |
| 8  | 1.393457  | -4.314412 | 0.000000  |

| <b>Frequencies</b> | <b>IR intensity</b> |
|--------------------|---------------------|
| 14.5501            | 0.4269              |
| 16.7457            | 1.9134              |
| 23.1188            | 0.2929              |
| 24.3448            | 0.1064              |
| 28.8458            | 0.4123              |
| 37.0183            | 0.5436              |
| 41.5897            | 0.1227              |
| 56.8876            | 0.2899              |
| 57.4863            | 0.9578              |
| 59.8485            | 2.8536              |
| 61.3982            | 0.1413              |
| 62.6326            | 0.0425              |
| 83.6381            | 0.7226              |
| 93.1313            | 1.4810              |
| 94.5337            | 27.4216             |
| 102.5627           | 7.5818              |
| 128.6907           | 33.7291             |
| 134.5530           | 0.3928              |
| 140.3095           | 1.1852              |
| 157.7321           | 0.8608              |
| 166.9964           | 0.0341              |
| 179.2266           | 0.0046              |
| 186.6044           | 0.0010              |
| 209.8920           | 11.7921             |

|           |          |
|-----------|----------|
| 212.2086  | 10.0763  |
| 228.1236  | 0.0005   |
| 232.9783  | 1.7139   |
| 268.7998  | 7.5728   |
| 281.2075  | 5.0870   |
| 294.1771  | 0.8938   |
| 303.6453  | 24.3331  |
| 306.2487  | 11.4092  |
| 322.3694  | 2.3340   |
| 335.6311  | 51.6706  |
| 925.7023  | 133.7393 |
| 2247.5146 | 69.5847  |
| 2252.8392 | 230.7608 |
| 2260.1099 | 89.6109  |
| 2264.5056 | 133.4196 |
| 2269.0464 | 75.5693  |
| 2276.8152 | 166.4987 |
| 2279.2307 | 14.6938  |

**ScO(CO)<sub>7</sub><sup>+</sup> (Sc\_7b)      Standard orientation**

| Atomic Number | Coordinates (Angstroms) |           |           |
|---------------|-------------------------|-----------|-----------|
|               | X                       | Y         | Z         |
| 21            | -0.391388               | 0.056672  | -0.034289 |
| 6             | 0.930653                | -2.066390 | 0.387654  |
| 6             | -1.543729               | -1.762319 | -1.364789 |
| 6             | 1.344304                | 0.606187  | 1.812927  |
| 6             | -2.551924               | 1.074854  | -1.008162 |
| 6             | -0.071153               | 2.548526  | -0.067809 |
| 8             | -1.864415               | -2.493056 | -2.151778 |
| 8             | 1.617061                | -2.951488 | 0.360211  |
| 8             | 0.239665                | 3.590794  | -0.340349 |
| 8             | 2.129958                | 0.867793  | 2.566617  |
| 8             | -3.416813               | 1.536997  | -1.549127 |
| 8             | 0.542189                | 0.209078  | -1.442806 |
| 6             | -2.072085               | -0.585700 | 2.199492  |
| 8             | -2.730669               | -0.846701 | 3.067690  |
| 6             | 3.874008                | -0.045230 | -0.586414 |
| 8             | 4.577862                | 0.110374  | -1.450123 |

**Frequencies      IR intensity**

|        |        |
|--------|--------|
| 8.7706 | 0.4953 |
|--------|--------|

---

|           |          |
|-----------|----------|
| 11.3035   | 0.1162   |
| 15.5943   | 0.1581   |
| 23.5169   | 0.5984   |
| 30.2121   | 0.2649   |
| 32.4951   | 0.4958   |
| 43.7822   | 2.5519   |
| 55.3805   | 0.2446   |
| 58.7922   | 1.0048   |
| 61.5947   | 2.1357   |
| 62.4052   | 0.8360   |
| 64.4600   | 0.1812   |
| 66.1210   | 0.2380   |
| 82.9536   | 27.4696  |
| 101.9286  | 22.6648  |
| 109.5287  | 17.2981  |
| 120.9350  | 4.1681   |
| 133.8166  | 0.4086   |
| 135.1821  | 0.8369   |
| 154.2193  | 0.0808   |
| 157.8984  | 0.4048   |
| 159.7220  | 0.1686   |
| 185.5637  | 0.0050   |
| 208.1270  | 13.4612  |
| 217.3193  | 10.1254  |
| 230.1800  | 0.6206   |
| 237.6204  | 0.5560   |
| 266.1450  | 1.8147   |
| 269.6363  | 0.5564   |
| 291.7560  | 31.7424  |
| 299.8290  | 13.1085  |
| 309.2820  | 3.6209   |
| 311.1946  | 1.9545   |
| 315.5227  | 43.0787  |
| 934.7842  | 129.8007 |
| 2234.3012 | 86.3738  |
| 2260.9567 | 192.5026 |
| 2265.8785 | 67.6775  |
| 2271.2286 | 131.5754 |
| 2272.3421 | 74.8313  |
| 2276.8664 | 150.8102 |
| 2280.7983 | 26.3929  |

---

**ScO(CO)<sub>7</sub><sup>+</sup> (Sc\_7c)**

**Standard orientation**

| Atomic Number | Coordinates (Angstroms) |           |           |
|---------------|-------------------------|-----------|-----------|
|               | X                       | Y         | Z         |
| 8             | -1.940844               | 0.855714  | 0.000000  |
| 6             | 1.062776                | -1.454489 | 1.673966  |
| 6             | 1.062776                | -1.454489 | -1.673966 |
| 6             | -1.485268               | -1.931240 | 0.000000  |
| 6             | -0.974731               | 0.565977  | 2.215443  |
| 6             | -0.974731               | 0.565977  | -2.215443 |
| 8             | -2.270758               | -2.736689 | 0.000000  |
| 8             | 1.508239                | -2.138666 | -2.445019 |
| 8             | 1.508239                | -2.138666 | 2.445019  |
| 8             | -1.498830               | 0.864748  | 3.163817  |
| 8             | -1.498830               | 0.864748  | -3.163817 |
| 6             | 0.223405                | 2.541391  | 0.000000  |
| 8             | 0.141248                | 3.662612  | 0.000000  |
| 6             | 2.369071                | 0.653774  | 0.000000  |
| 8             | 3.443061                | 0.988073  | 0.000000  |
| 21            | -0.134857               | 0.062077  | 0.000000  |

| Frequencies | IR intensity |
|-------------|--------------|
| -11.9968    | 0.1699       |
| 33.8694     | 0.1301       |
| 48.4609     | 0.2948       |
| 48.6616     | 0.1886       |
| 54.5927     | 0.0372       |
| 61.1641     | 0.0450       |
| 62.6955     | 0.2861       |
| 66.9533     | 0.6480       |
| 68.9460     | 1.2489       |
| 70.1857     | 1.1442       |
| 72.0013     | 0.5278       |
| 87.5714     | 12.7540      |
| 99.0132     | 2.6564       |
| 128.7667    | 2.4196       |
| 136.9209    | 12.9007      |
| 148.5413    | 2.0575       |
| 156.9062    | 0.3865       |
| 177.1598    | 2.7758       |
| 203.2815    | 3.8188       |
| 209.7895    | 2.8000       |
| 210.0256    | 0.1335       |
| 232.2914    | 1.3028       |

|           |          |
|-----------|----------|
| 241.3537  | 0.0365   |
| 245.3097  | 3.3759   |
| 271.2394  | 0.0653   |
| 275.7806  | 3.7114   |
| 305.1453  | 2.8949   |
| 311.4837  | 0.3195   |
| 312.2342  | 5.0406   |
| 322.6896  | 8.9223   |
| 336.9290  | 0.5738   |
| 338.6660  | 1.0057   |
| 342.3320  | 1.3568   |
| 370.1372  | 0.4670   |
| 557.0404  | 48.6611  |
| 2195.5019 | 997.5317 |
| 2200.2599 | 520.3318 |
| 2203.0239 | 904.4667 |
| 2213.4407 | 129.7872 |
| 2218.7467 | 213.3200 |
| 2220.1598 | 313.1435 |
| 2248.1639 | 27.8440  |

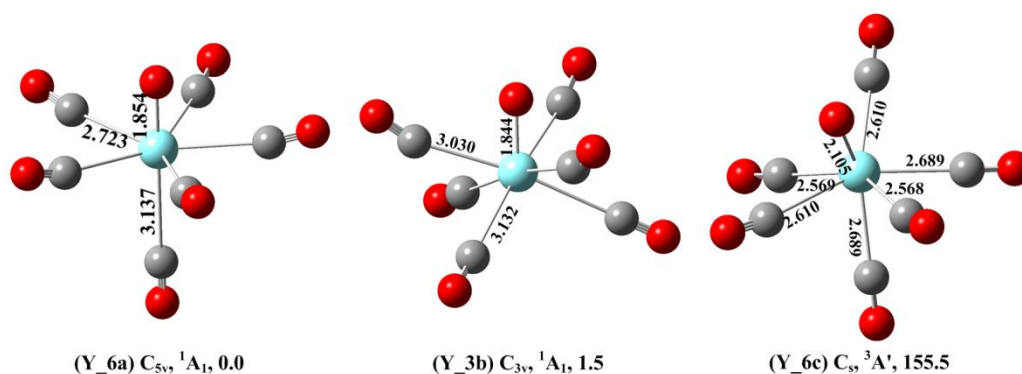

**Fig. S5.** Optimized structures of the minimum-energy isomers of the  $YO(CO)_6^+$  complexes. Relative energies (with ZPE correction) are given in kJ/mol.

**$YO(CO)_6^+$  (Y\_6a) Standard orientation**

| Atomic Number | Coordinates (Angstroms) |           |          |
|---------------|-------------------------|-----------|----------|
|               | X                       | Y         | Z        |
| 6             | 0.000000                | 2.716159  | 0.288757 |
| 6             | 2.583221                | 0.839339  | 0.288757 |
| 6             | -1.596518               | -2.197419 | 0.288757 |
| 6             | 1.596518                | -2.197419 | 0.288757 |
| 8             | 0.000000                | 3.793709  | 0.595098 |
| 8             | 2.229886                | -3.069175 | 0.595098 |
| 8             | -2.229886               | -3.069175 | 0.595098 |



---

|    |           |          |           |
|----|-----------|----------|-----------|
| 8  | 3.608032  | 1.172321 | 0.595098  |
| 6  | 0.000000  | 0.000000 | -3.045754 |
| 8  | 0.000000  | 0.000000 | -4.166885 |
| 8  | 0.000000  | 0.000000 | 1.945974  |
| 6  | -2.583221 | 0.839339 | 0.288757  |
| 8  | -3.608032 | 1.172321 | 0.595098  |
| 39 | 0.000000  | 0.000000 | 0.091672  |

---

---

| <b>Frequencies</b> | <b>IR intensity</b> |
|--------------------|---------------------|
| 2.6486             | 0.0227              |
| 2.6921             | 2.3285              |
| 3.5901             | 0.7293              |
| 4.5302             | 2.8682              |
| 39.8994            | 0.0204              |
| 47.9711            | 1.4464              |
| 48.2455            | 1.5522              |
| 58.0120            | 0.0011              |
| 58.2024            | 0.0002              |
| 69.3528            | 38.6597             |
| 70.1120            | 38.7821             |
| 88.5785            | 2.8656              |
| 120.4504           | 0.2951              |
| 120.5167           | 0.3031              |
| 139.3685           | 0.0010              |
| 139.5557           | 0.0001              |
| 154.2791           | 0.1872              |
| 176.5675           | 0.0002              |
| 187.6050           | 11.1383             |
| 187.6532           | 11.1202             |
| 226.1689           | 3.6887              |
| 226.5365           | 3.5975              |
| 242.5555           | 0.0001              |
| 242.7340           | 0.0008              |
| 261.0915           | 16.7400             |
| 261.1650           | 16.6953             |
| 265.5992           | 0.0283              |
| 265.9139           | 0.3600              |
| 266.0469           | 2.5004              |
| 806.4045           | 124.5384            |
| 2267.0529          | 81.6387             |
| 2270.8786          | 0.4152              |
| 2270.9059          | 1.1649              |

---

|           |          |
|-----------|----------|
| 2272.1053 | 293.1756 |
| 2272.2525 | 293.9954 |
| 2279.2290 | 1.4619   |

**YO(CO)<sub>6</sub><sup>+</sup> (Y\_6b)      Standard orientation**

| Atomic Number | Coordinates (Angstroms) |           |           |
|---------------|-------------------------|-----------|-----------|
|               | X                       | Y         | Z         |
| 6             | 0.000000                | 2.507426  | -0.852463 |
| 6             | -2.171495               | -1.253713 | -0.852463 |
| 6             | 2.171495                | -1.253713 | -0.852463 |
| 6             | 2.178079                | 1.257514  | 1.295010  |
| 6             | -2.178079               | 1.257514  | 1.295010  |
| 6             | 0.000000                | -2.515029 | 1.295010  |
| 8             | 0.000000                | 3.403291  | -1.528451 |
| 8             | 3.055250                | 1.763950  | 1.772678  |
| 8             | 0.000000                | 0.000000  | -1.850575 |
| 8             | 2.947337                | -1.701646 | -1.528451 |
| 8             | 0.000000                | -3.527899 | 1.772678  |
| 8             | -2.947337               | -1.701646 | -1.528451 |
| 8             | -3.055250               | 1.763950  | 1.772678  |
| 39            | 0.000000                | 0.000000  | 0.025059  |

**Frequencies      IR intensity**

|          |         |
|----------|---------|
| 15.4799  | 0.1041  |
| 16.6594  | 0.1212  |
| 29.9337  | 0.0032  |
| 49.9473  | 0.0209  |
| 50.1889  | 0.2558  |
| 50.4499  | 0.1890  |
| 51.1045  | 1.5250  |
| 51.1307  | 1.6976  |
| 55.1057  | 0.3900  |
| 109.8726 | 30.5174 |
| 110.4115 | 29.9717 |
| 132.1633 | 0.4302  |
| 135.9468 | 9.6773  |
| 136.5476 | 10.1418 |
| 162.5255 | 0.3200  |
| 178.8769 | 0.0951  |
| 179.6000 | 3.4116  |
| 179.8317 | 3.4818  |

|           |          |
|-----------|----------|
| 196.6089  | 6.5287   |
| 196.6867  | 6.0705   |
| 201.9910  | 2.1251   |
| 236.0573  | 11.9716  |
| 236.4757  | 11.8088  |
| 254.3000  | 2.3298   |
| 254.4332  | 2.4239   |
| 261.6378  | 0.0023   |
| 308.7069  | 0.2123   |
| 313.8349  | 27.2764  |
| 314.0277  | 27.0829  |
| 781.2505  | 107.6150 |
| 2248.2633 | 247.8193 |
| 2248.2987 | 247.6946 |
| 2256.1913 | 85.3094  |
| 2277.1690 | 105.8653 |
| 2277.2586 | 105.6964 |
| 2279.8570 | 56.9242  |

**YO(CO)<sub>6</sub><sup>+</sup> (Y\_6c)      Standard orientation**

| Atomic Number | Coordinates (Angstroms) |           |           |
|---------------|-------------------------|-----------|-----------|
|               | X                       | Y         | Z         |
| 6             | 0.018847                | -1.753967 | 1.911942  |
| 6             | -2.534559               | -0.267932 | 0.000000  |
| 6             | 2.546630                | -0.212919 | 0.000000  |
| 6             | -0.013134               | 1.285506  | -2.343342 |
| 8             | 0.022438                | -2.505357 | 2.746415  |
| 8             | -0.021866               | 1.925943  | -3.266032 |
| 8             | 3.668427                | -0.305090 | 0.000000  |
| 8             | -3.654770               | -0.377258 | 0.000000  |
| 6             | 0.018847                | -1.753967 | -1.911942 |
| 8             | 0.022438                | -2.505357 | -2.746415 |
| 8             | -0.040990               | 2.240404  | 0.000000  |
| 6             | -0.013134               | 1.285506  | 2.343342  |
| 8             | -0.021866               | 1.925943  | 3.266032  |
| 39            | 0.001757                | 0.136226  | 0.000000  |

**Frequencies      IR intensity**

|         |        |
|---------|--------|
| 18.6627 | 0.0007 |
| 25.0336 | 0.5044 |
| 36.1083 | 0.0102 |

---

|           |           |
|-----------|-----------|
| 41.3714   | 0.2058    |
| 42.0403   | 0.0014    |
| 42.2532   | 0.3522    |
| 42.8447   | 3.3004    |
| 58.9372   | 4.4471    |
| 59.0477   | 3.6466    |
| 59.1343   | 4.3239    |
| 84.0100   | 19.9932   |
| 145.4213  | 0.1073    |
| 167.4453  | 0.7929    |
| 173.3527  | 1.7889    |
| 188.2333  | 9.2588    |
| 207.0239  | 0.1034    |
| 211.8274  | 17.2912   |
| 216.7101  | 0.0003    |
| 228.5113  | 2.3409    |
| 230.4052  | 0.6890    |
| 231.7629  | 1.5261    |
| 240.9001  | 0.0000    |
| 249.8537  | 1.0787    |
| 254.5511  | 1.0183    |
| 256.7070  | 0.0000    |
| 283.7851  | 14.2762   |
| 295.3947  | 2.8763    |
| 301.1147  | 0.0010    |
| 304.3103  | 15.3510   |
| 536.8386  | 50.7518   |
| 2168.4968 | 2019.6650 |
| 2194.1210 | 1.9265    |
| 2198.2574 | 831.8769  |
| 2214.2520 | 765.7590  |
| 2215.7318 | 620.7640  |
| 2254.0519 | 21.5913   |

---

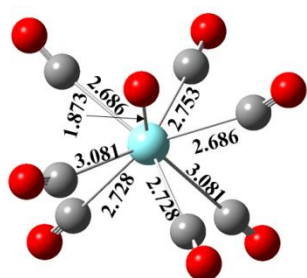

(Y\_7a)  $C_1, {}^1A, 0.0$

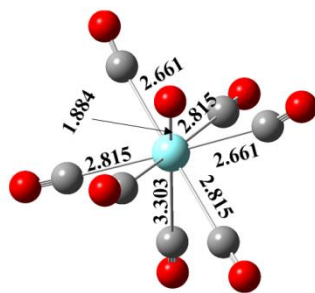

(Y\_7b)  $C_{3v}, {}^1A_1, 3.0$

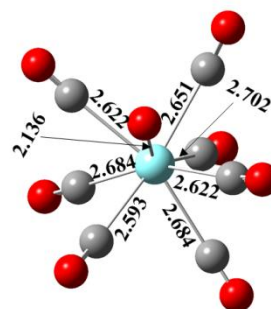

(Y\_7c)  $C_s, {}^3A', 153.7$

**Fig. S6.** Optimized structures of the minimum-energy isomers of the  $\text{YO}(\text{CO})_7^+$  complexes. Relative energies (with ZPE correction) are given in kJ/mol.

**$\text{YO}(\text{CO})_7^+$  (Y\_7a)**

**Standard orientation**

| Atomic Number | Coordinates (Angstroms) |           |           |
|---------------|-------------------------|-----------|-----------|
|               | X                       | Y         | Z         |
| 8             | -0.404468               | -0.002498 | -1.983991 |
| 6             | -1.568610               | 0.000004  | 2.464531  |
| 6             | 0.915305                | -2.588568 | -0.089421 |
| 6             | -2.114453               | -1.705009 | -0.549485 |
| 6             | -2.122176               | 1.695413  | -0.550335 |
| 6             | 2.222913                | 0.001740  | -1.529194 |
| 8             | -2.929223               | -2.304007 | -1.050144 |
| 8             | 1.294215                | -3.645196 | -0.183250 |
| 8             | -2.150810               | 0.000985  | 3.429864  |
| 8             | -2.940875               | 2.289492  | -1.050425 |
| 8             | 2.938385                | 0.002193  | -2.403296 |
| 6             | 0.904549                | 2.591598  | -0.097040 |
| 8             | 1.278315                | 3.649657  | -0.195284 |
| 6             | 2.117872                | 0.006691  | 2.091681  |
| 8             | 2.926953                | 0.010535  | 2.877213  |
| 39            | -0.057239               | -0.000526 | -0.153075 |

**Frequencies    IR intensity**

|          |         |
|----------|---------|
| 9.2751   | 0.0160  |
| 19.3200  | 0.6048  |
| 27.4376  | 0.4211  |
| 32.6664  | 0.2157  |
| 32.8448  | 0.0932  |
| 37.1046  | 0.3361  |
| 45.2699  | 1.1674  |
| 48.8630  | 0.7949  |
| 49.8481  | 3.2264  |
| 52.9196  | 0.1341  |
| 53.6316  | 0.1079  |
| 74.6880  | 3.7622  |
| 91.7962  | 36.4065 |
| 93.5634  | 7.0541  |
| 107.2307 | 41.5323 |
| 129.7622 | 0.1903  |
| 134.7927 | 0.4325  |
| 134.9459 | 0.0002  |

|           |          |
|-----------|----------|
| 147.4330  | 2.2001   |
| 155.2202  | 1.4607   |
| 158.1626  | 0.0287   |
| 164.5639  | 0.3159   |
| 174.1049  | 6.1396   |
| 178.1893  | 5.2073   |
| 180.3821  | 7.2492   |
| 213.7361  | 0.4204   |
| 215.5290  | 6.8543   |
| 232.8720  | 6.4018   |
| 242.5300  | 9.2045   |
| 248.9656  | 0.1023   |
| 254.4687  | 0.5905   |
| 285.0553  | 15.4265  |
| 297.6946  | 6.9672   |
| 312.9780  | 35.4799  |
| 786.4593  | 125.7071 |
| 2213.9926 | 246.1472 |
| 2224.4649 | 110.0144 |
| 2229.4600 | 153.6296 |
| 2237.5078 | 51.6334  |
| 2241.2138 | 82.3700  |
| 2247.3281 | 167.3273 |
| 2249.8356 | 15.3437  |

**YO(CO)<sub>7</sub><sup>+</sup> (Y\_7b)      Standard orientation**

| Atomic Number | Coordinates (Angstroms) |           |           |
|---------------|-------------------------|-----------|-----------|
|               | X                       | Y         | Z         |
| 8             | 0.000000                | 0.000000  | 2.085867  |
| 6             | -2.153716               | 1.243449  | 1.149104  |
| 6             | 0.000000                | 2.662334  | -0.713764 |
| 6             | -2.305649               | -1.331167 | -0.713764 |
| 6             | 2.153716                | 1.243449  | 1.149104  |
| 6             | 0.000000                | -2.486897 | 1.149104  |
| 6             | 2.305649                | -1.331167 | -0.713764 |
| 6             | 0.000000                | 0.000000  | -3.100921 |
| 8             | -2.907819               | 1.678830  | 1.858435  |
| 8             | 0.000000                | 3.738454  | -1.025637 |
| 8             | -3.237596               | -1.869227 | -1.025637 |
| 8             | 0.000000                | 0.000000  | -4.222740 |
| 8             | 3.237596                | -1.869227 | -1.025637 |
| 8             | 0.000000                | -3.357660 | 1.858435  |

|    |          |          |          |
|----|----------|----------|----------|
| 8  | 2.907819 | 1.678830 | 1.858435 |
| 39 | 0.000000 | 0.000000 | 0.201981 |

| <b>Frequencies</b> | <b>IR intensity</b> |
|--------------------|---------------------|
| 17.0146            | 0.7920              |
| 17.3203            | 0.7730              |
| 34.6194            | 0.2471              |
| 34.7931            | 0.2504              |
| 36.7442            | 0.2255              |
| 54.5191            | 1.5554              |
| 54.7811            | 1.4438              |
| 56.9527            | 0.1153              |
| 57.6174            | 0.7007              |
| 57.9443            | 0.3439              |
| 57.9925            | 0.9889              |
| 63.5473            | 2.2057              |
| 112.8726           | 29.4038             |
| 113.1197           | 28.6268             |
| 122.3475           | 0.8321              |
| 122.4720           | 0.7017              |
| 126.3279           | 0.6437              |
| 133.6768           | 11.5702             |
| 133.9810           | 12.5694             |
| 159.9204           | 0.6021              |
| 179.8321           | 0.0001              |
| 186.4413           | 15.3073             |
| 186.5588           | 15.2190             |
| 202.7367           | 0.7611              |
| 203.3507           | 0.7502              |
| 217.8725           | 0.6012              |
| 244.8900           | 11.0886             |
| 245.1244           | 11.0056             |
| 270.8471           | 0.7279              |
| 271.1182           | 0.6929              |
| 284.2215           | 0.0001              |
| 314.3859           | 0.0565              |
| 320.3532           | 28.5322             |
| 320.6305           | 28.5768             |
| 771.6495           | 122.1057            |
| 2239.5426          | 265.5856            |
| 2239.6320          | 265.6385            |
| 2248.2878          | 103.2731            |

|           |          |
|-----------|----------|
| 2260.4252 | 55.9474  |
| 2271.7702 | 132.7233 |
| 2271.8960 | 132.6342 |
| 2274.7173 | 35.4997  |

**YO(CO)<sub>7</sub><sup>+</sup> (Y\_7c)      Standard orientation**

| Atomic Number | Coordinates (Angstroms) |           |           |
|---------------|-------------------------|-----------|-----------|
|               | X                       | Y         | Z         |
| 8             | 0.684263                | 2.128598  | 0.000000  |
| 6             | -1.284921               | -1.228236 | 1.941569  |
| 6             | -1.284921               | -1.228236 | -1.941569 |
| 6             | -2.351672               | 1.192089  | 0.000000  |
| 6             | 0.518800                | 1.185119  | 2.332144  |
| 6             | 0.518800                | 1.185119  | -2.332144 |
| 8             | -3.304848               | 1.789304  | 0.000000  |
| 8             | -1.835120               | -1.730635 | -2.783394 |
| 8             | -1.835120               | -1.730635 | 2.783394  |
| 8             | 0.785979                | 1.791699  | 3.239155  |
| 8             | 0.785979                | 1.791699  | -3.239155 |
| 6             | 2.647581                | -0.073255 | 0.000000  |
| 8             | 3.765666                | 0.041447  | 0.000000  |
| 6             | 0.842504                | -2.463604 | 0.000000  |
| 8             | 1.237581                | -3.517759 | 0.000000  |
| 39            | 0.002255                | 0.104520  | 0.000000  |

**Frequencies      IR intensity**

|          |         |
|----------|---------|
| 17.0381  | 0.1098  |
| 25.5952  | 0.1764  |
| 41.0428  | 0.1453  |
| 42.9440  | 0.0357  |
| 48.2646  | 0.0213  |
| 49.8860  | 0.5830  |
| 55.2206  | 0.4722  |
| 56.4921  | 0.6733  |
| 60.2600  | 0.5160  |
| 61.7403  | 1.8712  |
| 63.8736  | 0.3824  |
| 87.1460  | 16.1237 |
| 95.0016  | 13.5313 |
| 139.5613 | 1.6192  |
| 140.4416 | 0.6823  |



|           |           |
|-----------|-----------|
| 161.1983  | 6.7311    |
| 165.2550  | 0.0255    |
| 175.7812  | 3.4366    |
| 179.9307  | 7.7992    |
| 198.2141  | 5.9366    |
| 208.1706  | 0.0420    |
| 225.7833  | 1.1673    |
| 226.7887  | 2.0596    |
| 240.1821  | 1.0253    |
| 245.8911  | 0.0710    |
| 247.8947  | 1.1964    |
| 269.3709  | 0.7372    |
| 279.0344  | 0.8391    |
| 280.3566  | 1.3255    |
| 288.2799  | 8.0335    |
| 289.6674  | 8.2852    |
| 301.3196  | 0.0345    |
| 303.8785  | 0.6270    |
| 320.9865  | 0.0563    |
| 503.5529  | 41.4641   |
| 2181.0599 | 1222.3838 |
| 2192.2597 | 969.3920  |
| 2197.0413 | 808.5596  |
| 2203.2027 | 656.9784  |
| 2213.8319 | 579.7901  |
| 2216.1535 | 134.4228  |
| 2251.1777 | 0.4893    |

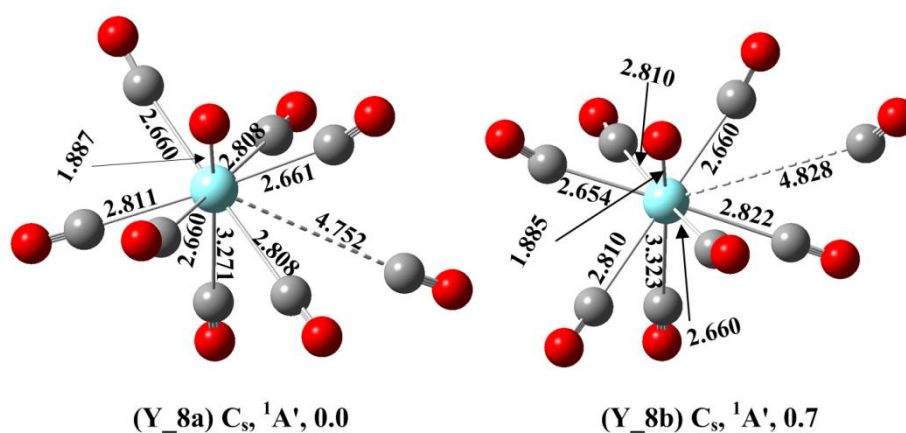

**Fig. S7.** Optimized structures of the minimum-energy isomers of the  $YO(CO)_8^+$  complexes. Relative energies (with ZPE correction) are given in kJ/mol.

$YO(CO)_8^+$  (Y\_8a)      **Standard orientation**

| Atomic Number | Coordinates (Angstroms) |           |           |
|---------------|-------------------------|-----------|-----------|
|               | X                       | Y         | Z         |
| 8             | 1.825461                | 1.521557  | 0.000000  |
| 6             | 0.403879                | 2.086802  | 2.162157  |
| 6             | -1.877670               | 2.432677  | 0.000000  |
| 6             | 0.088672                | -1.078379 | 2.284800  |
| 6             | 0.403879                | 2.086802  | -2.162157 |
| 6             | 2.306156                | -1.087909 | 0.000000  |
| 6             | 0.088672                | -1.078379 | -2.284800 |
| 6             | -2.680172               | -0.984997 | 0.000000  |
| 8             | 0.800443                | 2.817434  | 2.917611  |
| 8             | -2.668088               | 3.226929  | 0.000000  |
| 8             | 0.088672                | -1.711482 | 3.209363  |
| 8             | -3.655270               | -1.539957 | 0.000000  |
| 8             | 0.088672                | -1.711482 | -3.209363 |
| 8             | 3.363566                | -1.467161 | 0.000000  |
| 8             | 0.800443                | 2.817434  | -2.917611 |
| 39            | 0.208763                | 0.549187  | 0.000000  |
| 6             | -0.389820               | -4.165336 | 0.000000  |
| 8             | -0.419316               | -5.289016 | 0.000000  |

| Frequencies | IR intensity |
|-------------|--------------|
| 13.6949     | 0.1977       |
| 14.2129     | 1.2685       |
| 15.9856     | 1.3693       |
| 17.3445     | 0.5923       |
| 26.0782     | 0.4907       |
| 34.0913     | 0.3565       |
| 36.7742     | 0.0635       |
| 37.9858     | 0.1744       |
| 54.8090     | 1.8498       |
| 54.8832     | 1.6681       |
| 56.9779     | 0.5464       |
| 57.0907     | 0.2551       |
| 58.3038     | 0.8293       |
| 58.4951     | 0.3244       |
| 65.6509     | 1.8014       |
| 73.6993     | 0.0373       |
| 78.3873     | 1.0463       |
| 111.0546    | 31.5455      |
| 113.5675    | 31.5610      |
| 119.4458    | 2.9470       |

|           |          |
|-----------|----------|
| 127.4131  | 0.2385   |
| 128.0230  | 1.0953   |
| 134.0282  | 10.7204  |
| 134.7932  | 8.5339   |
| 159.5885  | 0.6145   |
| 180.1103  | 0.0011   |
| 185.6433  | 16.5192  |
| 186.8355  | 15.6476  |
| 201.8945  | 0.5897   |
| 205.2007  | 0.5276   |
| 219.4800  | 0.7790   |
| 245.5894  | 10.4450  |
| 245.8335  | 9.6540   |
| 270.3181  | 0.5697   |
| 271.7869  | 1.0095   |
| 284.8439  | 0.0005   |
| 315.4887  | 0.6401   |
| 321.2113  | 28.8942  |
| 322.0367  | 27.6733  |
| 765.3652  | 124.1013 |
| 2237.4132 | 264.0520 |
| 2237.5824 | 275.5284 |
| 2241.6121 | 92.5702  |
| 2246.4938 | 95.8734  |
| 2259.3935 | 56.4874  |
| 2270.5392 | 136.8862 |
| 2270.9828 | 128.5580 |
| 2273.7138 | 34.8883  |

**YO(CO)<sub>8</sub><sup>+</sup> (Y\_8b)      Standard orientation**

| Atomic Number | Coordinates (Angstroms) |           |           |
|---------------|-------------------------|-----------|-----------|
|               | X                       | Y         | Z         |
| 8             | -1.816981               | -0.541185 | 0.000000  |
| 6             | -0.351042               | -1.218878 | 2.127141  |
| 6             | 2.065724                | -1.361090 | 0.000000  |
| 6             | -0.054772               | 1.932705  | 2.330665  |
| 6             | -0.351042               | -1.218878 | -2.127141 |
| 6             | -2.200327               | 2.069606  | 0.000000  |
| 6             | -0.054772               | 1.932705  | -2.330665 |
| 6             | 2.629615                | 2.163782  | 0.000000  |
| 8             | -0.742709               | -1.957061 | 2.877525  |
| 8             | 2.951235                | -2.047472 | 0.000000  |
| 8             | -0.066396               | 2.539126  | 3.272769  |

---

|    |           |           |           |
|----|-----------|-----------|-----------|
| 8  | 3.573737  | 2.769856  | 0.000000  |
| 8  | -0.066396 | 2.539126  | -3.272769 |
| 8  | -3.245549 | 2.481327  | 0.000000  |
| 8  | -0.742709 | -1.957061 | -2.877525 |
| 39 | -0.165113 | 0.366915  | 0.000000  |
| 6  | 0.067956  | -4.455619 | 0.000000  |
| 8  | -0.352808 | -5.498614 | 0.000000  |

---

---

| <b>Frequencies</b> | <b>IR intensity</b> |
|--------------------|---------------------|
| 10.7605            | 0.8083              |
| 15.1249            | 0.3007              |
| 17.8331            | 0.7862              |
| 18.6113            | 0.2639              |
| 27.9628            | 0.7686              |
| 35.4604            | 0.3419              |
| 35.7446            | 0.2386              |
| 43.3621            | 1.0261              |
| 53.7546            | 0.8829              |
| 55.2740            | 1.4463              |
| 56.4856            | 0.1059              |
| 58.2218            | 0.5215              |
| 58.6423            | 1.0290              |
| 60.1398            | 0.5795              |
| 61.7381            | 2.1784              |
| 65.2832            | 0.4113              |
| 88.2388            | 3.8997              |
| 111.8941           | 28.7271             |
| 114.2278           | 29.0856             |
| 120.2548           | 2.8336              |
| 122.2928           | 0.2411              |
| 127.3449           | 0.7999              |
| 133.3332           | 12.7922             |
| 134.9146           | 9.8436              |
| 161.2661           | 0.6515              |
| 179.6807           | 0.0818              |
| 186.5337           | 13.9749             |
| 187.5140           | 15.0186             |
| 200.6964           | 1.5898              |
| 205.5573           | 0.4133              |
| 218.3347           | 0.9595              |
| 243.6077           | 10.6207             |
| 244.9385           | 10.8909             |

---

|           |          |
|-----------|----------|
| 269.0973  | 0.9182   |
| 269.6269  | 0.1441   |
| 283.6760  | 0.0646   |
| 314.1700  | 0.8252   |
| 319.0103  | 26.6176  |
| 321.8668  | 29.1035  |
| 766.4586  | 120.8341 |
| 2236.6940 | 254.9432 |
| 2237.7912 | 115.8403 |
| 2239.9851 | 245.0915 |
| 2247.9100 | 109.7631 |
| 2259.7197 | 55.8396  |
| 2271.2207 | 139.5186 |
| 2272.0681 | 114.0879 |
| 2274.7160 | 43.5052  |

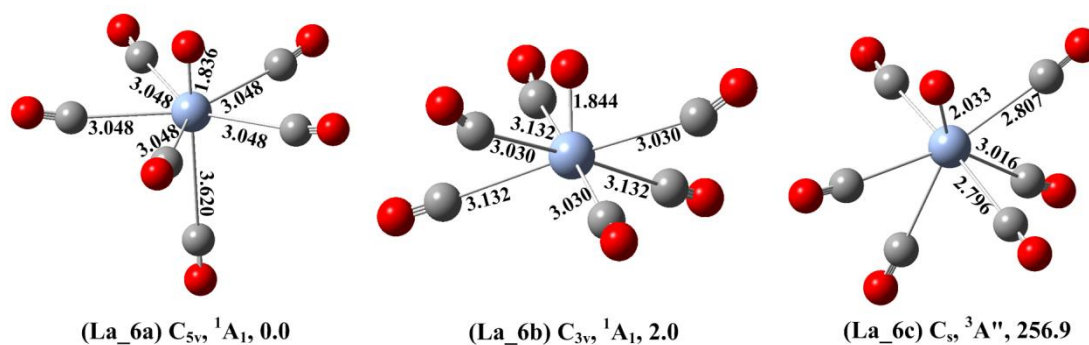

**Fig. S8.** Optimized structures of the minimum-energy isomers of the  $\text{LaO}(\text{CO})_6^+$  complexes. Relative energies (with ZPE correction) are given in kJ/mol.

**$\text{LaO}(\text{CO})_6^+$  (La\_6a) Standard orientation**

| Atomic Number | Coordinates (Angstroms) |           |           |
|---------------|-------------------------|-----------|-----------|
|               | X                       | Y         | Z         |
| 6             | 0.000000                | 3.044271  | 0.312484  |
| 6             | 2.895274                | 0.940731  | 0.312484  |
| 6             | -1.789377               | -2.462867 | 0.312484  |
| 6             | 1.789377                | -2.462867 | 0.312484  |
| 8             | 0.000000                | 4.135391  | 0.568880  |
| 8             | 2.430722                | -3.345602 | 0.568880  |
| 8             | -2.430722               | -3.345602 | 0.568880  |
| 8             | 3.932991                | 1.277906  | 0.568880  |
| 6             | 0.000000                | 0.000000  | -3.457769 |
| 8             | 0.000000                | 0.000000  | -4.580261 |
| 8             | 0.000000                | 0.000000  | 1.998825  |
| 6             | -2.895274               | 0.940731  | 0.312484  |

|    |           |          |          |
|----|-----------|----------|----------|
| 8  | -3.932991 | 1.277906 | 0.568880 |
| 57 | 0.000000  | 0.000000 | 0.162604 |

| <b>Frequencies</b> | <b>IR intensity</b> |
|--------------------|---------------------|
| -7.3203            | 2.1245              |
| -7.1252            | 2.1591              |
| 10.9084            | 0.0036              |
| 12.3673            | 0.0145              |
| 22.8052            | 0.0141              |
| 28.2238            | 0.3301              |
| 28.5490            | 0.4015              |
| 36.9442            | 0.0026              |
| 37.0395            | 0.0001              |
| 53.4055            | 27.2205             |
| 53.4905            | 27.2111             |
| 63.4809            | 2.4139              |
| 97.2013            | 0.1525              |
| 97.2239            | 0.1528              |
| 106.9569           | 0.0006              |
| 107.2445           | 0.0002              |
| 112.2689           | 0.0077              |
| 131.4146           | 14.0533             |
| 131.4454           | 14.0001             |
| 141.1310           | 0.0059              |
| 164.9358           | 5.3769              |
| 165.2678           | 5.4766              |
| 180.6071           | 0.0008              |
| 180.7830           | 0.0024              |
| 183.5942           | 0.0045              |
| 184.2760           | 0.0292              |
| 191.5239           | 1.2635              |
| 193.6657           | 6.2966              |
| 193.9984           | 5.9609              |
| 791.4803           | 187.8875            |
| 2255.6790          | 75.3156             |
| 2268.9878          | 0.0552              |
| 2269.0417          | 0.7699              |
| 2270.2571          | 191.1319            |
| 2270.3535          | 191.8852            |
| 2273.3702          | 4.8502              |

**LaO(CO)<sub>6</sub><sup>+</sup> (La\_6b) Standard orientation**

| Atomic Number | Coordinates (Angstroms) |           |           |
|---------------|-------------------------|-----------|-----------|
|               | X                       | Y         | Z         |
| 8             | 0.000000                | 0.000000  | -1.746008 |
| 6             | 0.000000                | 2.910870  | -0.743527 |
| 6             | -2.562539               | 1.479482  | 1.123456  |
| 6             | 2.562539                | 1.479482  | 1.123456  |
| 6             | -2.520888               | -1.455435 | -0.743527 |
| 6             | 2.520888                | -1.455435 | -0.743527 |
| 6             | 0.000000                | -2.958965 | 1.123456  |
| 8             | 0.000000                | 3.832647  | -1.382693 |
| 8             | -3.491859               | 2.016026  | 1.447546  |
| 8             | 3.491859                | 2.016026  | 1.447546  |
| 8             | 0.000000                | -4.032051 | 1.447546  |
| 8             | 3.319170                | -1.916323 | -1.382693 |
| 8             | -3.319170               | -1.916323 | -1.382693 |
| 57            | 0.000000                | 0.000000  | 0.097769  |

| Frequencies | IR intensity |
|-------------|--------------|
| 10.4419     | 0.0000       |
| 10.4781     | 0.0000       |
| 21.7424     | 0.0009       |
| 28.9760     | 0.1372       |
| 36.1040     | 0.3726       |
| 36.1260     | 0.3722       |
| 38.9234     | 0.0576       |
| 38.9335     | 0.0576       |
| 41.4315     | 0.0000       |
| 80.1550     | 16.0232      |
| 80.1837     | 16.0051      |
| 95.3969     | 0.5803       |
| 99.0026     | 1.0308       |
| 99.0045     | 1.0311       |
| 107.2751    | 0.0122       |
| 129.6682    | 23.7808      |
| 129.6757    | 23.8029      |
| 135.8683    | 0.0003       |
| 148.0034    | 0.0177       |
| 148.0555    | 0.0183       |
| 163.2253    | 0.7477       |
| 177.7467    | 9.2085       |
| 177.7973    | 9.1845       |

|           |          |
|-----------|----------|
| 189.3398  | 0.0096   |
| 189.3630  | 0.0086   |
| 199.8177  | 0.0000   |
| 210.6238  | 0.2855   |
| 222.6225  | 12.2031  |
| 222.6230  | 12.2028  |
| 778.6613  | 170.2850 |
| 2260.5016 | 96.4038  |
| 2260.5018 | 96.4482  |
| 2261.9639 | 77.0713  |
| 2268.8047 | 113.2590 |
| 2268.8049 | 113.2826 |
| 2270.7210 | 9.1839   |

**LaO(CO)<sub>6</sub><sup>+</sup> (La\_6c) Standard orientation**

| Atomic Number | Coordinates (Angstroms) |           |           |
|---------------|-------------------------|-----------|-----------|
|               | X                       | Y         | Z         |
| 6             | -0.000346               | -2.113318 | 1.752345  |
| 6             | -2.790145               | 0.148507  | 0.000000  |
| 6             | 2.789355                | 0.147004  | 0.000000  |
| 6             | 0.000676                | 0.880980  | -2.754621 |
| 8             | -0.000346               | -2.978910 | 2.466636  |
| 8             | 0.000877                | 1.241914  | -3.820122 |
| 8             | 3.915229                | 0.146316  | 0.000000  |
| 8             | -3.915999               | 0.148589  | 0.000000  |
| 6             | -0.000346               | -2.113318 | -1.752345 |
| 8             | -0.000346               | -2.978910 | -2.466636 |
| 8             | 0.000437                | 2.374634  | 0.000000  |
| 6             | 0.000676                | 0.880980  | 2.754621  |
| 8             | 0.000877                | 1.241914  | 3.820122  |
| 57            | -0.000088               | 0.341239  | 0.000000  |

| Frequencies | IR intensity |
|-------------|--------------|
| -24.3024    | 0.0000       |
| 17.5559     | 0.4684       |
| 19.6128     | 0.1436       |
| 28.5153     | 0.0378       |
| 29.8726     | 1.5933       |
| 30.8558     | 0.0000       |
| 36.0823     | 0.1313       |
| 42.0776     | 10.4836      |



|           |           |
|-----------|-----------|
| 51.6389   | 0.2192    |
| 57.9011   | 2.6738    |
| 87.4184   | 8.1239    |
| 116.8479  | 4.9566    |
| 119.3448  | 0.0000    |
| 136.2496  | 10.6813   |
| 148.3475  | 24.3269   |
| 151.5478  | 0.6507    |
| 173.4985  | 0.0000    |
| 175.5965  | 1.0703    |
| 184.6243  | 2.7945    |
| 186.5129  | 0.3351    |
| 191.6040  | 0.0000    |
| 198.2290  | 0.0843    |
| 201.7575  | 0.2016    |
| 206.6806  | 0.4996    |
| 226.1874  | 0.0000    |
| 252.1188  | 0.5984    |
| 257.6210  | 0.3057    |
| 259.0522  | 4.8681    |
| 273.3505  | 6.4812    |
| 554.0773  | 80.9909   |
| 2163.8578 | 2354.9719 |
| 2182.6818 | 27.0690   |
| 2184.7891 | 1736.5413 |
| 2215.2851 | 412.7632  |
| 2217.2443 | 317.3899  |
| 2248.9980 | 128.3669  |

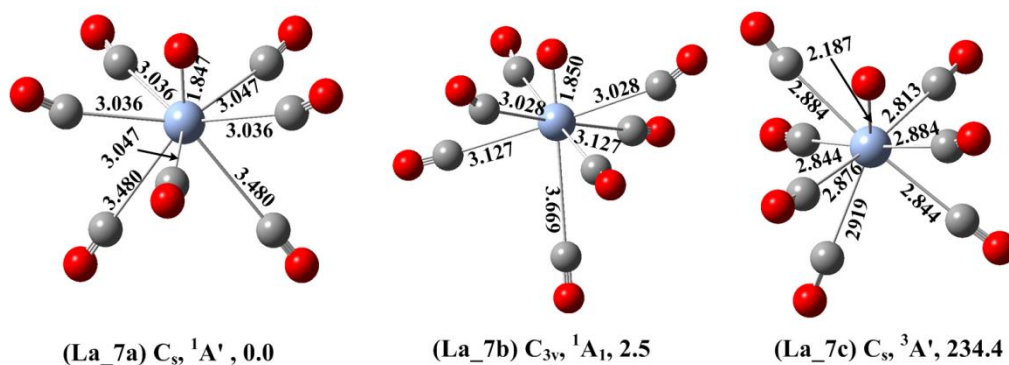

**Fig. S9.** Optimized structures of the minimum-energy isomers of the  $\text{LaO}(\text{CO})_7^+$  complexes. Relative energies (with ZPE correction) are given in kJ/mol.

$\text{LaO}(\text{CO})_7^+$  (La\_7a)      Standard orientation

| Atomic Number | Coordinates (Angstroms) |           |           |
|---------------|-------------------------|-----------|-----------|
|               | X                       | Y         | Z         |
| 6             | 2.477034                | -0.472033 | 1.776284  |
| 6             | -0.995503               | -0.996021 | 2.750365  |
| 6             | 2.477034                | -0.472033 | -1.776284 |
| 6             | -0.995503               | -0.996021 | -2.750365 |
| 6             | -3.046799               | -0.183285 | 0.000000  |
| 8             | -1.307024               | -1.606156 | 3.638660  |
| 8             | 3.343758                | -0.804963 | 2.404849  |
| 8             | -4.158445               | -0.326607 | 0.000000  |
| 8             | 3.343758                | -0.804963 | -2.404849 |
| 8             | -1.307024               | -1.606156 | -3.638660 |
| 8             | 0.076603                | -2.048323 | 0.000000  |
| 6             | -0.005417               | 2.614418  | -2.043277 |
| 8             | -0.017646               | 3.527757  | -2.695455 |
| 57            | 0.016083                | -0.202166 | 0.000000  |
| 6             | -0.005417               | 2.614418  | 2.043277  |
| 8             | -0.017646               | 3.527757  | 2.695455  |

| Frequencies | IR intensity |
|-------------|--------------|
| 2.5927      | 0.0372       |
| 11.8330     | 0.2192       |
| 18.2792     | 0.6741       |
| 18.4615     | 0.0442       |
| 21.6063     | 0.1042       |
| 22.1709     | 0.2634       |
| 29.0327     | 0.1182       |
| 29.5234     | 0.3201       |
| 30.6041     | 0.4833       |
| 35.4469     | 0.0095       |
| 36.6364     | 0.0306       |
| 51.3975     | 4.1203       |
| 60.9802     | 27.1322      |
| 66.4975     | 4.0938       |
| 79.8925     | 21.0028      |
| 102.4313    | 0.0805       |
| 102.5218    | 0.1355       |
| 108.6420    | 0.0623       |
| 109.3690    | 0.0451       |
| 111.0628    | 0.0159       |
| 116.0048    | 0.0131       |
| 123.2367    | 1.0754       |
| 127.1480    | 11.2917      |

|           |          |
|-----------|----------|
| 129.6506  | 15.0716  |
| 136.0865  | 2.9068   |
| 158.1583  | 5.4334   |
| 164.0508  | 13.1885  |
| 173.4444  | 0.1279   |
| 177.5424  | 2.7372   |
| 179.1075  | 0.0899   |
| 190.5490  | 1.1619   |
| 199.3365  | 5.3819   |
| 213.5528  | 1.7076   |
| 222.7136  | 13.0374  |
| 777.5116  | 192.8038 |
| 2256.2397 | 25.4038  |
| 2257.3581 | 126.8302 |
| 2260.2950 | 136.6701 |
| 2261.1991 | 32.3625  |
| 2265.6966 | 76.6994  |
| 2267.8989 | 149.5952 |
| 2270.7579 | 32.3659  |

**LaO(CO)<sub>7</sub><sup>+</sup> (La\_7b) Standard orientation**

| Atomic Number | Coordinates (Angstroms) |           |           |
|---------------|-------------------------|-----------|-----------|
|               | X                       | Y         | Z         |
| 8             | 0.000000                | 0.000000  | 2.043510  |
| 6             | -2.503470               | 1.445379  | 1.094214  |
| 6             | 0.000000                | 3.019146  | -0.622464 |
| 6             | -2.614657               | -1.509573 | -0.622464 |
| 6             | 2.503470                | 1.445379  | 1.094214  |
| 6             | 0.000000                | -2.890758 | 1.094214  |
| 6             | 2.614657                | -1.509573 | -0.622464 |
| 6             | 0.000000                | 0.000000  | -3.475222 |
| 8             | -3.280701               | 1.894113  | 1.767591  |
| 8             | 0.000000                | 4.114820  | -0.860619 |
| 8             | -3.563539               | -2.057410 | -0.860619 |
| 8             | 0.000000                | 0.000000  | -4.598011 |
| 8             | 3.563539                | -2.057410 | -0.860619 |
| 8             | 0.000000                | -3.788227 | 1.767591  |
| 8             | 3.280701                | 1.894113  | 1.767591  |
| 57            | 0.000000                | 0.000000  | 0.193483  |

| Frequencies | IR intensity |
|-------------|--------------|
| 7.3371      | 0.5008       |

|           |          |
|-----------|----------|
| 7.3463    | 0.5013   |
| 14.7687   | 0.2023   |
| 14.7729   | 0.2010   |
| 23.1154   | 0.0020   |
| 29.9210   | 0.1181   |
| 36.9662   | 0.4941   |
| 36.9704   | 0.4957   |
| 41.1824   | 0.1989   |
| 41.1846   | 0.1971   |
| 43.5492   | 0.0000   |
| 56.4778   | 1.8112   |
| 80.3635   | 17.3596  |
| 80.3720   | 17.3466  |
| 93.6109   | 0.7857   |
| 95.1206   | 0.9515   |
| 95.1451   | 0.9523   |
| 97.5605   | 1.1261   |
| 97.5620   | 1.1235   |
| 106.5492  | 0.0938   |
| 127.3126  | 24.3218  |
| 127.3159  | 24.3175  |
| 134.9814  | 0.0000   |
| 150.6569  | 0.0968   |
| 150.6635  | 0.0941   |
| 166.1351  | 0.2763   |
| 179.0935  | 8.1205   |
| 179.0941  | 8.1125   |
| 193.8805  | 0.0000   |
| 193.8885  | 0.0000   |
| 205.3996  | 0.0000   |
| 215.1298  | 0.1035   |
| 227.0110  | 12.6964  |
| 227.0128  | 12.6935  |
| 771.2107  | 190.9982 |
| 2252.8353 | 78.2824  |
| 2257.2153 | 101.0589 |
| 2257.2154 | 101.1044 |
| 2258.8851 | 74.4668  |
| 2265.8889 | 123.8465 |
| 2265.8889 | 123.8494 |
| 2267.9497 | 4.3965   |

**LaO(CO)<sub>7</sub><sup>+</sup> (La\_7c)      Standard orientation**

| Atomic Number | Coordinates (Angstroms) |           |           |
|---------------|-------------------------|-----------|-----------|
|               | X                       | Y         | Z         |
| 8             | 0.934603                | -2.034715 | 0.000000  |
| 6             | -0.002224               | 1.595805  | 2.345847  |
| 6             | -0.002224               | 1.595805  | -2.345847 |
| 6             | 2.621270                | 1.259875  | 0.000000  |
| 6             | 0.585044                | -1.508670 | 2.416123  |
| 6             | 0.585044                | -1.508670 | -2.416123 |
| 8             | 3.656744                | 1.700854  | 0.000000  |
| 8             | -0.002224               | 2.202765  | -3.294193 |
| 8             | -0.002224               | 2.202765  | 3.294193  |
| 8             | 0.837937                | -2.233073 | 3.236261  |
| 8             | 0.837937                | -2.233073 | -3.236261 |
| 6             | -2.219466               | -1.696113 | 0.000000  |
| 8             | -3.037175               | -2.466899 | 0.000000  |
| 6             | -2.408860               | 1.475092  | 0.000000  |
| 8             | -3.393643               | 2.019999  | 0.000000  |
| 57            | 0.112156                | -0.009609 | 0.000000  |

| Frequencies | IR intensity |
|-------------|--------------|
| 21.4016     | 0.0601       |
| 22.4623     | 0.1510       |
| 29.8991     | 0.2931       |
| 31.2302     | 0.0383       |
| 34.7553     | 1.3393       |
| 36.1950     | 0.6390       |
| 40.7886     | 1.0568       |
| 41.0237     | 0.6175       |
| 48.9535     | 0.9034       |
| 52.3802     | 0.0784       |
| 52.6513     | 0.9295       |
| 74.7738     | 14.1959      |
| 76.6138     | 10.2148      |
| 118.1067    | 5.3994       |
| 122.6707    | 0.9982       |
| 125.0494    | 0.4633       |
| 135.2533    | 10.2479      |
| 138.7464    | 5.9959       |
| 147.6938    | 2.4541       |
| 164.8742    | 3.2104       |
| 180.8396    | 0.0418       |
| 192.7654    | 0.4322       |
| 198.8148    | 0.0080       |

|           |           |
|-----------|-----------|
| 200.3938  | 0.2223    |
| 209.5866  | 0.0089    |
| 212.9955  | 0.4992    |
| 219.9220  | 1.5046    |
| 224.0843  | 0.5300    |
| 248.8650  | 0.1814    |
| 250.3487  | 3.9469    |
| 251.8518  | 0.6060    |
| 255.5137  | 3.4446    |
| 261.5751  | 1.1067    |
| 263.5123  | 0.8815    |
| 485.5042  | 66.6484   |
| 2166.3814 | 1554.7783 |
| 2176.5302 | 1353.1357 |
| 2185.3951 | 394.0902  |
| 2195.9070 | 1100.5181 |
| 2221.7431 | 195.3218  |
| 2224.7555 | 432.9880  |
| 2244.8492 | 20.9724   |

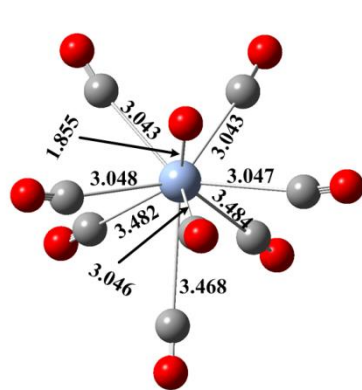

(La\_8a)  $C_s$ ,  $^1A'$ , 0.0

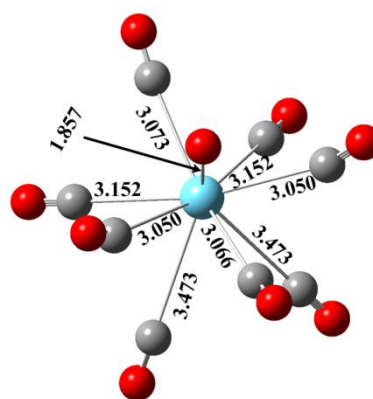

(La\_8b)  $C_s$ ,  $^1A'$ , 2.2

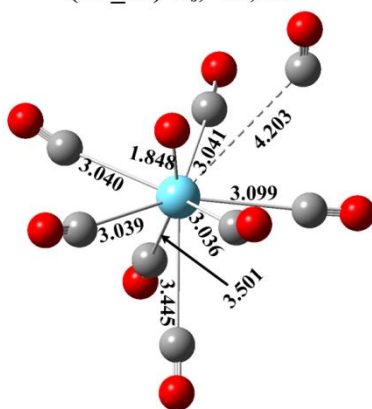

(La\_8c)  $C_1$ ,  $^1A$ , 3.4

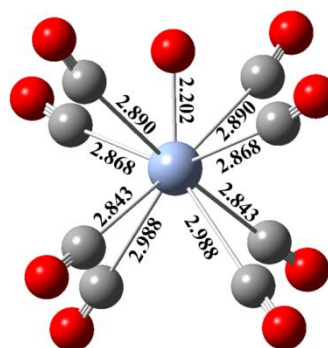

(La\_8d)  $C_{2v}$ ,  $^3B_1$ , 227.5

**Fig. S10.** Optimized structures of the minimum-energy isomers of the  $\text{LaO}(\text{CO})_8^+$

complexes. Relative energies (with ZPE correction) are given in kJ/mol.

**LaO(CO)<sub>8</sub><sup>+</sup> (La\_8a) Standard orientation**

| Atomic Number | Coordinates (Angstroms) |           |           |
|---------------|-------------------------|-----------|-----------|
|               | X                       | Y         | Z         |
| 6             | -1.456805               | -2.555853 | -1.076950 |
| 6             | -2.933605               | 0.665334  | -0.705953 |
| 6             | 1.953784                | -2.261130 | -0.913309 |
| 6             | 2.737216                | 1.250346  | -0.758030 |
| 6             | -0.269388               | 2.863132  | -1.238625 |
| 8             | -3.954937               | 0.894683  | -1.108421 |
| 8             | -1.923053               | -3.364613 | -1.699542 |
| 8             | -0.350171               | 3.736091  | -1.939348 |
| 8             | 2.606574                | -2.998143 | -1.451110 |
| 8             | 3.678221                | 1.672887  | -1.198400 |
| 8             | 0.024751                | -0.034679 | -2.127607 |
| 6             | 2.117372                | -0.691894 | 2.414893  |
| 8             | 2.792665                | -0.922337 | 3.281581  |
| 57            | 0.006481                | -0.012338 | -0.272795 |
| 6             | -1.732164               | -1.446849 | 2.380777  |
| 8             | -2.280487               | -1.938609 | 3.227968  |
| 6             | -0.461443               | 2.239034  | 2.322995  |
| 8             | -0.605966               | 2.996039  | 3.139198  |

| Frequencies | IR intensity |
|-------------|--------------|
| 0.4725      | 0.0046       |
| 12.5733     | 0.2441       |
| 14.6066     | 0.0679       |
| 20.9187     | 0.2831       |
| 22.8928     | 0.1231       |
| 25.0569     | 0.0182       |
| 25.6219     | 0.2381       |
| 29.3174     | 0.0250       |
| 30.5111     | 0.0447       |
| 31.9570     | 0.1447       |
| 32.9807     | 0.2710       |
| 38.5062     | 0.0776       |
| 38.9630     | 0.2768       |
| 46.5084     | 4.7527       |
| 52.6621     | 0.8816       |
| 65.9393     | 3.9000       |
| 72.2974     | 21.1541      |

|           |          |
|-----------|----------|
| 84.3932   | 21.7204  |
| 97.1773   | 0.0420   |
| 97.7534   | 0.2336   |
| 100.9385  | 0.1869   |
| 105.7210  | 0.1477   |
| 107.1408  | 0.1261   |
| 115.0651  | 1.3374   |
| 118.5391  | 2.6948   |
| 121.4922  | 0.4238   |
| 122.7999  | 10.1055  |
| 130.5126  | 11.3971  |
| 131.8009  | 8.5483   |
| 135.2998  | 0.7640   |
| 160.7341  | 14.9128  |
| 162.0699  | 8.5738   |
| 171.8328  | 0.4118   |
| 173.2243  | 0.5296   |
| 194.1462  | 1.5787   |
| 199.7044  | 2.0200   |
| 213.0778  | 8.0295   |
| 219.5551  | 2.2436   |
| 233.8260  | 18.2513  |
| 768.1349  | 202.8219 |
| 2253.5138 | 24.1229  |
| 2253.7126 | 3.3516   |
| 2254.6730 | 163.2917 |
| 2255.9711 | 158.8529 |
| 2257.0684 | 49.1092  |
| 2260.0449 | 102.3437 |
| 2263.0798 | 171.4770 |
| 2265.5738 | 19.9561  |

**LaO(CO)<sub>8</sub><sup>+</sup> (La\_8b) Standard orientation**

| Atomic Number | Coordinates (Angstroms) |           |           |
|---------------|-------------------------|-----------|-----------|
|               | X                       | Y         | Z         |
| 8             | -0.766930               | -1.886620 | 0.000000  |
| 6             | -3.268200               | -0.272589 | 0.000000  |
| 6             | -1.570132               | 1.399983  | 2.398017  |
| 6             | -1.570132               | 1.399983  | -2.398017 |
| 6             | 0.448298                | -1.443359 | 2.669867  |
| 6             | 0.448298                | -1.443359 | -2.669867 |
| 6             | 2.566811                | -1.442162 | 0.000000  |
| 6             | 2.001076                | 1.846708  | 1.831580  |



|    |           |           |           |
|----|-----------|-----------|-----------|
| 8  | -4.278507 | -0.762150 | 0.000000  |
| 8  | -2.084571 | 1.895258  | 3.262839  |
| 8  | -2.084571 | 1.895258  | -3.262839 |
| 8  | 2.715990  | 2.463632  | 2.438680  |
| 8  | 3.449131  | -2.134836 | 0.000000  |
| 8  | 0.479514  | -2.253229 | -3.446739 |
| 8  | 0.479514  | -2.253229 | 3.446739  |
| 6  | 2.001076  | 1.846708  | -1.831580 |
| 8  | 2.715990  | 2.463632  | -2.438680 |
| 57 | -0.199071 | -0.118828 | 0.000000  |

| <b>Frequencies</b> | <b>IR intensity</b> |
|--------------------|---------------------|
| 8.8721             | 0.0059              |
| 11.9269            | 0.0690              |
| 21.9232            | 0.0082              |
| 22.8152            | 0.0564              |
| 24.0251            | 0.1041              |
| 26.2262            | 0.4121              |
| 28.8371            | 0.1445              |
| 34.0355            | 0.2933              |
| 36.6013            | 0.5749              |
| 38.0014            | 0.4553              |
| 39.7419            | 0.2170              |
| 39.8683            | 0.1515              |
| 42.0411            | 0.0432              |
| 49.0649            | 0.2140              |
| 56.0467            | 2.1061              |
| 81.8433            | 9.1110              |
| 85.7362            | 1.2651              |
| 86.9340            | 14.9487             |
| 91.7400            | 4.7447              |
| 93.2905            | 0.0473              |
| 99.2828            | 1.6667              |
| 104.7312           | 0.2703              |
| 110.9710           | 3.7935              |
| 114.4148           | 4.1172              |
| 122.6057           | 18.4358             |
| 126.8252           | 13.1751             |
| 132.0680           | 7.8739              |
| 136.5737           | 1.3796              |
| 140.7527           | 4.6662              |
| 148.8683           | 5.5021              |
| 173.0575           | 3.7175              |

|           |          |
|-----------|----------|
| 174.8633  | 9.7439   |
| 183.3668  | 0.1861   |
| 188.6389  | 0.3865   |
| 196.2740  | 3.5577   |
| 202.5456  | 0.0328   |
| 221.9095  | 0.5242   |
| 234.4124  | 16.6595  |
| 240.5525  | 19.5861  |
| 762.2788  | 196.0464 |
| 2250.5493 | 69.6137  |
| 2250.5605 | 99.3715  |
| 2252.4484 | 154.6911 |
| 2253.1111 | 60.4426  |
| 2254.9524 | 53.6651  |
| 2261.7590 | 152.4160 |
| 2263.3418 | 107.1954 |
| 2265.0586 | 17.8946  |

**LaO(CO)<sub>8</sub><sup>+</sup> (La\_8c) Standard orientation**

| Atomic Number | Coordinates (Angstroms) |           |           |
|---------------|-------------------------|-----------|-----------|
|               | X                       | Y         | Z         |
| 6             | 2.113127                | -1.277142 | -2.039183 |
| 6             | -0.581639               | -2.940006 | -0.117653 |
| 6             | 1.358748                | 2.116536  | -1.916505 |
| 6             | -1.518371               | 2.509917  | 0.257689  |
| 6             | -1.711523               | -0.492128 | 2.327485  |
| 8             | -1.035677               | -3.922835 | -0.411603 |
| 8             | 2.598392                | -1.750824 | -2.932466 |
| 8             | -2.431835               | -0.680365 | 3.165653  |
| 8             | 1.588856                | 2.807494  | -2.769430 |
| 8             | -2.255175               | 3.350170  | 0.164122  |
| 8             | -0.908808               | -0.183080 | -1.576897 |
| 6             | 1.994973                | 2.245271  | 1.885413  |
| 8             | 2.594506                | 2.947247  | 2.523909  |
| 57            | 0.168013                | 0.002239  | -0.086076 |
| 6             | 2.523735                | -1.756834 | 1.709281  |
| 8             | 3.294689                | -2.326231 | 2.293238  |
| 6             | -4.021794               | -0.219914 | -0.338794 |
| 8             | -4.759984               | -0.396802 | -1.169036 |

| Frequencies | IR intensity |
|-------------|--------------|
| 5.0369      | 0.3021       |

---

|           |          |
|-----------|----------|
| 10.3718   | 0.1294   |
| 14.2093   | 0.4367   |
| 15.9830   | 2.0884   |
| 18.5271   | 0.2239   |
| 20.2284   | 0.2775   |
| 23.4760   | 0.8511   |
| 23.9031   | 0.4813   |
| 27.0413   | 0.3744   |
| 28.4123   | 0.3731   |
| 29.8688   | 0.1703   |
| 32.3207   | 0.0642   |
| 36.2729   | 0.1339   |
| 39.8283   | 7.5120   |
| 44.6395   | 2.7590   |
| 57.2537   | 0.8096   |
| 61.8749   | 9.0250   |
| 69.9710   | 11.9750  |
| 80.9937   | 19.4428  |
| 101.4905  | 0.0418   |
| 102.1183  | 0.1272   |
| 107.7912  | 0.1608   |
| 109.1192  | 0.1351   |
| 111.3182  | 0.0815   |
| 115.0279  | 0.1141   |
| 121.8865  | 0.0554   |
| 123.6090  | 5.2861   |
| 128.7394  | 10.3050  |
| 131.8792  | 15.5999  |
| 136.2776  | 3.0213   |
| 157.4351  | 7.1099   |
| 163.5719  | 11.7778  |
| 170.9395  | 0.0708   |
| 175.1517  | 0.2616   |
| 181.3222  | 3.3074   |
| 196.6258  | 0.5131   |
| 202.9494  | 3.5253   |
| 210.8931  | 7.8367   |
| 218.3619  | 11.4560  |
| 780.7228  | 202.4635 |
| 2234.4244 | 84.2397  |
| 2255.5811 | 40.1842  |
| 2257.1410 | 109.3746 |
| 2260.0656 | 82.4660  |
| 2262.0885 | 52.5724  |

---

|           |          |
|-----------|----------|
| 2263.6572 | 150.8489 |
| 2265.7681 | 97.3492  |
| 2269.3080 | 40.6950  |

**LaO(CO)<sub>8</sub><sup>+</sup> (La\_8d) Standard orientation**

| Atomic Number | Coordinates (Angstroms) |           |           |
|---------------|-------------------------|-----------|-----------|
|               | X                       | Y         | Z         |
| 6             | 0.000000                | 2.358254  | 1.753608  |
| 6             | -2.746500               | 0.000000  | 0.909346  |
| 6             | 2.746500                | 0.000000  | 0.909346  |
| 6             | 0.000000                | -2.455271 | -1.349806 |
| 6             | 0.000000                | -2.358254 | 1.753608  |
| 8             | -3.751192               | 0.000000  | 1.413917  |
| 8             | 0.000000                | 3.135497  | 2.565259  |
| 8             | 0.000000                | -3.135497 | 2.565259  |
| 8             | 3.751192                | 0.000000  | 1.413917  |
| 8             | 0.000000                | -3.446436 | -1.885649 |
| 8             | 0.000000                | 0.000000  | 2.285504  |
| 6             | 2.007994                | 0.000000  | -2.129416 |
| 8             | 2.807163                | 0.000000  | -2.920541 |
| 57            | 0.000000                | 0.000000  | 0.083218  |
| 6             | 0.000000                | 2.455271  | -1.349806 |
| 8             | 0.000000                | 3.446436  | -1.885649 |
| 6             | -2.007994               | 0.000000  | -2.129416 |
| 8             | -2.807163               | 0.000000  | -2.920541 |

| Frequencies | IR intensity |
|-------------|--------------|
| 17.5177     | 0.0000       |
| 21.1540     | 0.0297       |
| 27.8377     | 0.1779       |
| 30.6964     | 0.0000       |
| 31.0142     | 0.5036       |
| 39.3337     | 4.8369       |
| 42.5357     | 0.8024       |
| 43.8115     | 0.4491       |
| 44.2513     | 6.6919       |
| 46.4110     | 0.0000       |
| 50.6239     | 0.2657       |
| 51.4621     | 1.4812       |
| 56.1042     | 0.2706       |
| 57.1288     | 1.9227       |
| 83.1948     | 11.4883      |

---

|           |           |
|-----------|-----------|
| 101.5307  | 0.1956    |
| 112.0134  | 4.4503    |
| 116.0179  | 2.3008    |
| 119.1316  | 2.6445    |
| 132.3655  | 5.5025    |
| 133.2493  | 1.6529    |
| 136.2293  | 10.9088   |
| 156.1549  | 0.0478    |
| 176.1322  | 0.0000    |
| 186.3909  | 0.4390    |
| 194.1411  | 0.0010    |
| 194.5170  | 2.4078    |
| 198.0580  | 0.0000    |
| 217.6474  | 0.0000    |
| 218.3294  | 0.0003    |
| 224.6298  | 0.0534    |
| 229.2269  | 0.0309    |
| 235.3689  | 4.1244    |
| 255.7741  | 0.0000    |
| 256.6407  | 5.0136    |
| 262.9995  | 0.5333    |
| 263.7377  | 0.0314    |
| 266.8270  | 0.5179    |
| 272.2455  | 0.1764    |
| 464.7059  | 61.7288   |
| 2160.3689 | 1685.3721 |
| 2178.8655 | 659.2196  |
| 2198.4125 | 1038.2175 |
| 2205.0067 | 676.7457  |
| 2207.2864 | 604.9197  |
| 2217.5571 | 86.9685   |
| 2218.2616 | 401.8779  |
| 2242.6908 | 1.3831    |

---

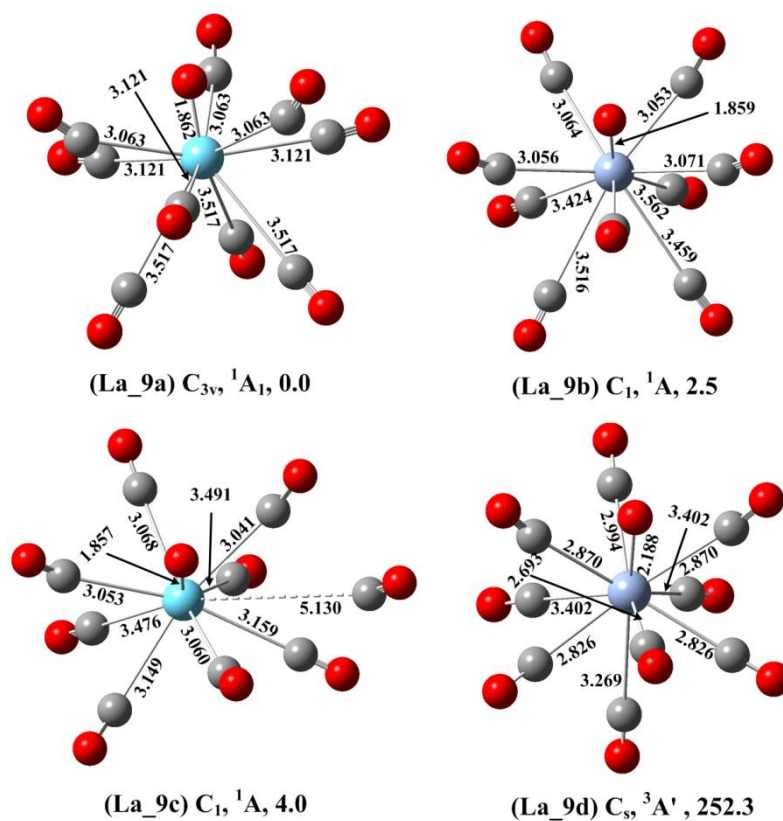

**Fig. S11.** Optimized structures of the minimum-energy isomers of the  $\text{LaO}(\text{CO})_9^+$  complexes. Relative energies (with ZPE correction) are given in kJ/mol.

**$\text{LaO}(\text{CO})_9^+$  (La\_9a) Standard orientation**

| Atomic Number | Coordinates (Angstroms) |           |           |
|---------------|-------------------------|-----------|-----------|
|               | X                       | Y         | Z         |
| 8             | 0.000000                | 0.000000  | 2.180155  |
| 6             | -2.458543               | 1.419441  | 1.468097  |
| 6             | 0.000000                | 3.109001  | 0.039460  |
| 6             | -2.692473               | -1.554500 | 0.039460  |
| 6             | 2.458543                | 1.419441  | 1.468097  |
| 6             | 0.000000                | -2.838881 | 1.468097  |
| 6             | 2.692473                | -1.554500 | 0.039460  |
| 6             | 1.982722                | 1.144725  | -2.351203 |
| 8             | -3.135533               | 1.810301  | 2.274566  |
| 8             | 0.000000                | 4.230778  | 0.056520  |
| 8             | -3.663961               | -2.115389 | 0.056520  |
| 8             | 2.638677                | 1.523441  | -3.180119 |
| 8             | 3.663961                | -2.115389 | 0.056520  |
| 8             | 0.000000                | -3.620602 | 2.274566  |
| 8             | 3.135533                | 1.810301  | 2.274566  |
| 6             | 0.000000                | -2.289450 | -2.351203 |

|    |           |           |           |
|----|-----------|-----------|-----------|
| 8  | 0.000000  | -3.046882 | -3.180119 |
| 57 | 0.000000  | 0.000000  | 0.317915  |
| 6  | -1.982722 | 1.144725  | -2.351203 |
| 8  | -2.638677 | 1.523441  | -3.180119 |

| <b>Frequencies</b> | <b>IR intensity</b> |
|--------------------|---------------------|
| 15.2156            | 0.0593              |
| 15.2245            | 0.0588              |
| 21.0846            | 0.0753              |
| 21.0915            | 0.0757              |
| 22.7917            | 0.0001              |
| 23.1181            | 0.2116              |
| 27.3639            | 0.0320              |
| 28.8583            | 0.1778              |
| 28.8838            | 0.1778              |
| 35.3043            | 0.5041              |
| 38.9345            | 1.1534              |
| 38.9385            | 1.1487              |
| 42.7343            | 0.0462              |
| 42.7356            | 0.0457              |
| 46.9862            | 0.0000              |
| 48.0337            | 0.0017              |
| 48.0389            | 0.0017              |
| 57.1049            | 2.3709              |
| 83.6038            | 0.7883              |
| 87.1424            | 2.3110              |
| 87.1488            | 2.2900              |
| 90.2088            | 8.5028              |
| 90.2183            | 8.5043              |
| 95.3129            | 0.0014              |
| 100.0212           | 0.0004              |
| 102.4820           | 2.2377              |
| 102.5809           | 2.3078              |
| 115.2729           | 0.8161              |
| 115.3231           | 0.8245              |
| 126.0040           | 29.0684             |
| 126.0234           | 29.1346             |
| 126.2410           | 0.0412              |
| 130.5165           | 0.0001              |
| 152.7948           | 5.6259              |
| 152.7999           | 5.6311              |
| 173.1134           | 0.0745              |
| 184.8343           | 5.5574              |

|           |          |
|-----------|----------|
| 184.8373  | 5.5607   |
| 200.8666  | 0.0007   |
| 200.8692  | 0.0008   |
| 213.1952  | 0.0000   |
| 223.6654  | 0.1972   |
| 241.4180  | 20.4108  |
| 241.4223  | 20.4071  |
| 758.7962  | 207.4835 |
| 2245.3838 | 97.1635  |
| 2245.3839 | 97.1740  |
| 2247.6702 | 139.7326 |
| 2251.1133 | 45.9535  |
| 2251.1177 | 45.8984  |
| 2252.9065 | 95.9425  |
| 2259.6767 | 149.2509 |
| 2259.6770 | 149.3165 |
| 2262.0305 | 1.1011   |

**LaO(CO)<sub>9</sub><sup>+</sup> (La\_9b) Standard orientation**

| Atomic Number | Coordinates (Angstroms) |           |           |
|---------------|-------------------------|-----------|-----------|
|               | X                       | Y         | Z         |
| 6             | -1.853995               | -1.852757 | -1.695889 |
| 6             | -2.063112               | 1.820799  | -1.491287 |
| 6             | 1.542361                | -2.562974 | -1.040150 |
| 6             | 3.122449                | 0.294209  | -0.527431 |
| 6             | 1.103951                | 2.882462  | -0.762534 |
| 8             | -2.677790               | 2.378398  | -2.247030 |
| 8             | -2.399003               | -2.387202 | -2.518898 |
| 8             | 1.467431                | 3.808810  | -1.281587 |
| 8             | 2.042463                | -3.349524 | -1.665706 |
| 8             | 4.149221                | 0.396898  | -0.969110 |
| 8             | 0.447313                | 0.134955  | -2.094361 |
| 6             | 1.896960                | -0.197546 | 2.790357  |
| 8             | 2.511629                | -0.276396 | 3.726838  |
| 57            | 0.092254                | 0.025113  | -0.272616 |
| 6             | -3.060642               | -0.213457 | 1.266045  |
| 8             | -4.067512               | -0.289646 | 1.757414  |
| 6             | -0.720566               | 2.317781  | 2.186223  |
| 8             | -0.942201               | 3.086236  | 2.974283  |
| 6             | -0.551313               | -2.656909 | 1.756112  |
| 8             | -0.750934               | -3.555163 | 2.399459  |



| <b>Frequencies</b> | <b>IR intensity</b> |
|--------------------|---------------------|
| -5.8235            | 0.4554              |
| 4.1722             | 0.1880              |
| 18.6012            | 0.4154              |
| 20.9230            | 0.3252              |
| 21.3904            | 0.0638              |
| 24.6937            | 0.2384              |
| 26.9530            | 0.4303              |
| 27.7832            | 0.5560              |
| 32.3996            | 0.1091              |
| 32.9135            | 0.1795              |
| 34.2980            | 0.1996              |
| 35.2315            | 0.1218              |
| 36.9703            | 0.9615              |
| 37.7922            | 2.3745              |
| 41.4069            | 1.3759              |
| 44.3158            | 0.2781              |
| 45.7245            | 1.3285              |
| 50.6383            | 1.7550              |
| 62.0590            | 7.8836              |
| 67.2863            | 21.0202             |
| 77.3482            | 19.2890             |
| 88.5529            | 0.1826              |
| 91.3912            | 0.3052              |
| 93.0693            | 0.0871              |
| 100.2122           | 0.3257              |
| 109.5644           | 2.5256              |
| 110.2217           | 2.7676              |
| 111.0045           | 3.6728              |
| 116.2461           | 7.6511              |
| 118.6163           | 11.9163             |
| 125.5334           | 0.4573              |
| 132.7704           | 0.2839              |
| 139.9406           | 4.3783              |
| 143.4613           | 7.0525              |
| 149.9371           | 4.6745              |
| 161.5973           | 7.3944              |
| 164.8190           | 9.8504              |
| 170.1409           | 0.2871              |
| 185.3612           | 0.2693              |
| 208.7547           | 0.1031              |
| 214.1532           | 0.0061              |
| 222.5017           | 0.1612              |

|           |          |
|-----------|----------|
| 233.0520  | 16.7580  |
| 234.4644  | 19.4015  |
| 767.9501  | 205.5246 |
| 2249.5690 | 8.9311   |
| 2250.4597 | 24.1043  |
| 2251.5959 | 2.6552   |
| 2252.0083 | 14.1028  |
| 2252.4647 | 10.1003  |
| 2253.1420 | 211.4302 |
| 2253.8976 | 260.6122 |
| 2254.3413 | 261.9690 |
| 2259.4826 | 14.8509  |

**LaO(CO)<sub>9</sub><sup>+</sup> (La\_9c) Standard orientation**

| Atomic Number | Coordinates (Angstroms) |           |           |
|---------------|-------------------------|-----------|-----------|
|               | X                       | Y         | Z         |
| 8             | 0.431193                | 0.634509  | -1.708344 |
| 6             | 1.717546                | 2.453465  | 0.276485  |
| 6             | -1.491251               | 2.722363  | 1.273510  |
| 6             | 1.981730                | -0.429049 | 2.089642  |
| 6             | -2.424807               | 1.405208  | -1.808796 |
| 6             | 1.596704                | -2.041608 | -1.056760 |
| 6             | -1.744979               | -1.924123 | -1.770396 |
| 6             | -3.414720               | -0.361701 | 1.318456  |
| 8             | 2.461119                | 3.234309  | -0.036477 |
| 8             | -1.912554               | 3.670108  | 1.700394  |
| 8             | 2.784504                | -0.619678 | 2.849396  |
| 8             | -4.444133               | -0.516013 | 1.739020  |
| 8             | -2.160776               | -2.573541 | -2.585147 |
| 8             | 2.327823                | -2.568205 | -1.726524 |
| 8             | -2.866776               | 1.907175  | -2.710648 |
| 6             | -0.737617               | -2.801579 | 1.752165  |
| 8             | -0.878319               | -3.761937 | 2.316462  |
| 57            | -0.263713               | 0.146086  | -0.057199 |
| 6             | 4.860432                | 0.098768  | -0.299159 |
| 8             | 5.879599                | 0.211102  | -0.761947 |

| Frequencies | IR intensity |
|-------------|--------------|
| 6.3609      | 0.0503       |
| 10.5772     | 0.1668       |
| 14.5695     | 0.0084       |
| 16.7888     | 0.1138       |

---

|           |          |
|-----------|----------|
| 21.2897   | 0.0966   |
| 23.4019   | 0.4005   |
| 23.6345   | 0.1371   |
| 24.8130   | 0.3151   |
| 29.4321   | 0.1092   |
| 32.2969   | 1.0252   |
| 33.9748   | 0.2964   |
| 36.0615   | 0.5786   |
| 38.7878   | 0.3689   |
| 40.0622   | 0.3476   |
| 42.5026   | 0.0397   |
| 42.9920   | 0.2026   |
| 47.7428   | 0.4900   |
| 54.0784   | 2.8439   |
| 62.5821   | 0.8392   |
| 75.4202   | 10.3959  |
| 78.7562   | 12.7643  |
| 85.8406   | 5.5246   |
| 87.7271   | 2.0322   |
| 91.1266   | 4.5062   |
| 94.2939   | 0.3160   |
| 99.5993   | 0.6894   |
| 105.1258  | 0.2245   |
| 110.9606  | 2.9567   |
| 114.0025  | 2.8607   |
| 122.7985  | 17.0956  |
| 126.8835  | 18.7795  |
| 132.2101  | 6.2759   |
| 136.9699  | 1.3678   |
| 142.4066  | 2.2690   |
| 148.9585  | 4.2594   |
| 172.3798  | 3.8463   |
| 173.5089  | 9.4076   |
| 182.7586  | 0.1063   |
| 186.4771  | 0.7465   |
| 195.6463  | 3.4904   |
| 201.9484  | 0.0104   |
| 221.7853  | 0.4851   |
| 232.2367  | 14.4339  |
| 240.0010  | 19.2276  |
| 769.7025  | 194.2350 |
| 2234.8905 | 89.6048  |
| 2249.6193 | 90.1266  |
| 2250.4084 | 74.8384  |

---

|           |          |
|-----------|----------|
| 2251.9504 | 132.4176 |
| 2252.4738 | 90.4947  |
| 2254.3474 | 48.1898  |
| 2261.0410 | 150.4281 |
| 2262.9769 | 101.9748 |
| 2264.6478 | 22.6092  |

**LaO(CO)<sub>9</sub><sup>+</sup> (La\_9d) Standard orientation**

| Atomic Number | Coordinates (Angstroms) |           |           |
|---------------|-------------------------|-----------|-----------|
|               | X                       | Y         | Z         |
| 8             | 2.124237                | 1.185540  | 0.000000  |
| 6             | 2.022345                | -2.038388 | 0.000000  |
| 6             | -0.064364               | -1.545642 | 2.333151  |
| 6             | -0.064364               | -1.545642 | -2.333151 |
| 6             | 1.615895                | 1.004963  | 2.336005  |
| 6             | 1.615895                | 1.004963  | -2.336005 |
| 6             | -0.347218               | 2.940252  | 0.000000  |
| 6             | -2.447270               | 0.919743  | 1.823281  |
| 8             | 2.841166                | -2.819416 | 0.000000  |
| 8             | -0.004888               | -2.210301 | 3.244283  |
| 8             | -0.004888               | -2.210301 | -3.244283 |
| 8             | -3.210286               | 1.131203  | 2.619996  |
| 8             | -0.345223               | 4.063037  | 0.000000  |
| 8             | 2.318621                | 1.414731  | -3.112483 |
| 8             | 2.318621                | 1.414731  | 3.112483  |
| 6             | -2.447270               | 0.919743  | -1.823281 |
| 8             | -3.210286               | 1.131203  | -2.619996 |
| 57            | 0.277159                | 0.011870  | 0.000000  |
| 6             | -2.202348               | -2.118897 | 0.000000  |
| 8             | -3.062808               | -2.840821 | 0.000000  |

| Frequencies | IR intensity |
|-------------|--------------|
| -50.5235    | 0.0510       |
| -16.6696    | 10.1972      |
| 16.9356     | 0.3230       |
| 23.8035     | 0.1126       |
| 28.0339     | 2.8307       |
| 28.6871     | 0.5021       |
| 29.3426     | 1.5282       |
| 32.8175     | 0.0889       |
| 33.9333     | 1.4550       |
| 34.7447     | 1.2792       |

---

|           |           |
|-----------|-----------|
| 38.8153   | 7.5882    |
| 43.2982   | 2.5327    |
| 44.7748   | 0.8622    |
| 45.9316   | 0.6613    |
| 55.5871   | 0.3561    |
| 57.2327   | 0.4360    |
| 59.7220   | 0.6462    |
| 64.4772   | 15.4670   |
| 66.3813   | 2.0337    |
| 80.2419   | 14.6851   |
| 92.8717   | 12.6270   |
| 97.9700   | 2.5348    |
| 106.5002  | 7.9384    |
| 114.3749  | 2.3223    |
| 118.1791  | 4.6519    |
| 118.7833  | 0.6915    |
| 137.8795  | 0.5927    |
| 148.7157  | 3.8936    |
| 157.3514  | 2.9055    |
| 164.8653  | 8.1038    |
| 166.7380  | 0.5045    |
| 178.1189  | 0.1431    |
| 194.5136  | 0.0800    |
| 199.7457  | 1.7204    |
| 210.4055  | 2.7243    |
| 219.7251  | 0.1757    |
| 227.9870  | 2.7152    |
| 243.5674  | 0.6237    |
| 252.2027  | 3.2870    |
| 256.4775  | 0.2681    |
| 261.4544  | 2.1238    |
| 268.3497  | 1.7950    |
| 282.8787  | 0.6015    |
| 290.1583  | 2.5711    |
| 477.8849  | 71.5795   |
| 2109.9549 | 845.6105  |
| 2112.4621 | 2504.9790 |
| 2158.8010 | 1183.4962 |
| 2200.3674 | 607.6109  |
| 2218.2903 | 349.4134  |
| 2233.7184 | 249.7387  |
| 2236.9702 | 149.6088  |
| 2238.8241 | 86.9573   |
| 2247.5568 | 150.1763  |

---

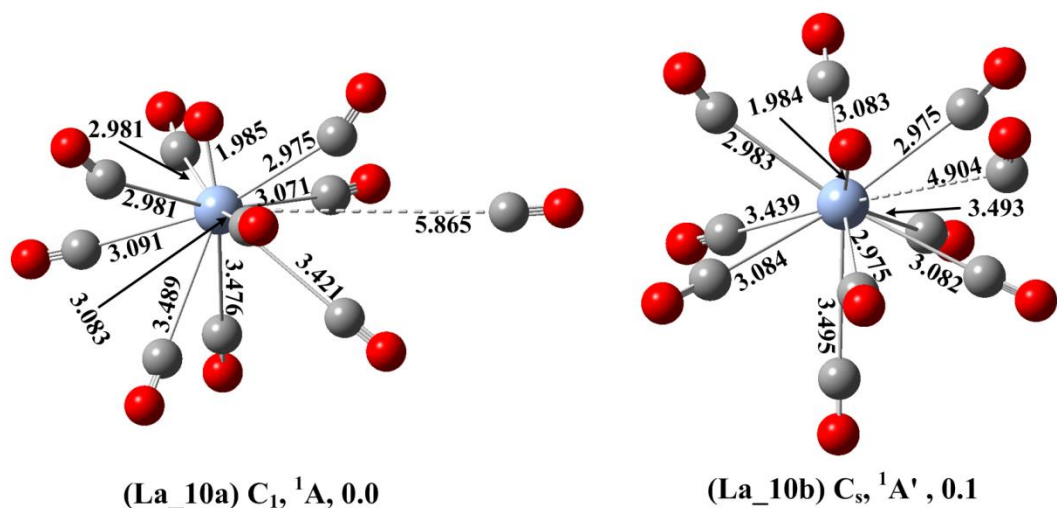

**Fig. S12.** Optimized structures of the minimum-energy isomers of the LaO(CO)<sub>10</sub><sup>+</sup> complexes. Relative energies (with ZPE correction) are given in kJ/mol.

| LaO(CO) <sub>10</sub> <sup>+</sup> (La_10a) | Standard orientation    |           |           |
|---------------------------------------------|-------------------------|-----------|-----------|
| Atomic Number                               | Coordinates (Angstroms) |           |           |
|                                             | X                       | Y         | Z         |
| 8                                           | 0.642288                | -0.056679 | -2.189699 |
| 6                                           | 2.754249                | -1.853458 | -1.234460 |
| 6                                           | 3.367620                | 1.020277  | 0.298717  |
| 6                                           | -0.100270               | -3.066867 | -0.084328 |
| 6                                           | 1.162359                | 2.737796  | -1.495965 |
| 6                                           | -2.074110               | -0.977015 | -1.697075 |
| 6                                           | -1.857245               | 2.033537  | -0.369904 |
| 6                                           | 0.610240                | 2.319808  | 2.333181  |
| 8                                           | 3.430729                | -2.371449 | -1.966268 |
| 8                                           | 4.418691                | 1.389600  | 0.431427  |
| 8                                           | -0.299656               | -4.170519 | -0.116457 |
| 8                                           | 0.657327                | 3.083088  | 3.155537  |
| 8                                           | -2.689350               | 2.773954  | -0.504272 |
| 8                                           | -2.736729               | -1.250970 | -2.561717 |
| 8                                           | 1.396220                | 3.482702  | -2.303399 |
| 6                                           | -1.931059               | -0.685825 | 2.065878  |
| 8                                           | -2.729191               | -0.912369 | 2.822598  |
| 57                                          | 0.482459                | -0.011878 | -0.335392 |
| 6                                           | 1.889064                | -1.470322 | 2.570418  |
| 8                                           | 2.335190                | -1.932524 | 3.491582  |
| 6                                           | -5.487814               | 0.012419  | 0.190590  |
| 8                                           | -6.612817               | -0.002967 | 0.197549  |

| <b>Frequencies</b> | <b>IR intensity</b> |
|--------------------|---------------------|
| 6.4704             | 0.0631              |
| 10.3505            | 0.1611              |
| 13.9808            | 0.4413              |
| 16.6951            | 0.1359              |
| 19.8356            | 0.3910              |
| 20.9332            | 0.2491              |
| 22.6918            | 0.1486              |
| 23.0350            | 0.0619              |
| 27.3723            | 0.1866              |
| 27.8168            | 0.1869              |
| 29.0732            | 0.2972              |
| 31.5733            | 0.1823              |
| 36.5567            | 0.4550              |
| 37.7873            | 2.0291              |
| 39.1998            | 1.5577              |
| 42.2177            | 0.0102              |
| 43.9165            | 0.0384              |
| 46.7039            | 0.0039              |
| 47.8921            | 0.0008              |
| 48.6341            | 0.2835              |
| 58.4687            | 2.1073              |
| 63.3438            | 0.0610              |
| 66.1349            | 0.1837              |
| 81.8371            | 18.5680             |
| 84.6827            | 1.0665              |
| 85.8090            | 8.1396              |
| 89.4502            | 1.7665              |
| 90.4137            | 4.5011              |
| 96.5865            | 0.1606              |
| 100.8773           | 0.0761              |
| 103.0223           | 2.0210              |
| 104.5358           | 1.9809              |
| 115.7511           | 1.4965              |
| 116.9956           | 0.8213              |
| 122.0666           | 24.7785             |
| 124.6189           | 23.1611             |
| 131.1040           | 1.5367              |
| 131.6855           | 2.1731              |
| 151.9369           | 4.9348              |
| 154.4136           | 4.1299              |
| 173.6280           | 0.2666              |
| 184.9387           | 5.2427              |

|           |          |
|-----------|----------|
| 185.4787  | 4.6590   |
| 201.4736  | 0.0083   |
| 201.5957  | 0.0236   |
| 213.8843  | 0.0242   |
| 225.3613  | 0.2732   |
| 239.9732  | 17.7544  |
| 244.0767  | 19.9405  |
| 762.4496  | 206.4477 |
| 2233.0737 | 97.7381  |
| 2244.7508 | 97.5553  |
| 2245.2924 | 93.5666  |
| 2247.3920 | 144.6972 |
| 2249.8567 | 48.1021  |
| 2250.4032 | 47.6001  |
| 2252.1476 | 88.9849  |
| 2259.1716 | 147.5544 |
| 2259.6434 | 144.0799 |
| 2261.8332 | 4.0970   |

**LaO(CO)<sub>10</sub><sup>+</sup> (La\_10b)      Standard orientation**

| Atomic Number | Coordinates (Angstroms) |           |           |
|---------------|-------------------------|-----------|-----------|
|               | X                       | Y         | Z         |
| 57            | 0.113833                | -0.000645 | -0.181982 |
| 8             | -1.147866               | -0.004773 | -1.550404 |
| 6             | -1.656249               | -2.482220 | 0.015188  |
| 6             | -1.649341               | 2.488583  | -0.017238 |
| 6             | -1.908590               | 0.018683  | 2.185916  |
| 6             | 1.174058                | 1.986286  | 2.558671  |
| 6             | 1.473468                | 2.678283  | -1.051769 |
| 6             | 3.618185                | -0.009565 | 0.188526  |
| 6             | 1.402146                | -0.013798 | -2.963340 |
| 6             | 1.457993                | -2.691180 | -1.035332 |
| 6             | 1.164974                | -1.965106 | 2.573374  |
| 8             | 1.480632                | -2.600351 | 3.443926  |
| 8             | 1.869547                | -3.658457 | -1.427514 |
| 8             | -2.472007               | -3.202063 | -0.263442 |
| 8             | -2.686025               | 0.027105  | 2.994631  |
| 8             | -2.463850               | 3.204910  | -0.308393 |
| 8             | 1.493129                | 2.629300  | 3.422254  |
| 8             | 1.891429                | 3.640402  | -1.449825 |
| 8             | 4.737933                | -0.014351 | 0.272686  |
| 8             | 1.413558                | -0.017631 | -4.086551 |



|   |           |           |           |
|---|-----------|-----------|-----------|
| 6 | -4.569527 | -0.006811 | -0.423914 |
| 8 | -5.307880 | -0.001865 | -1.273304 |

| <b>Frequencies</b> | <b>IR intensity</b> |
|--------------------|---------------------|
| 11.3273            | 0.1615              |
| 13.4616            | 0.0630              |
| 18.8420            | 0.1875              |
| 18.9903            | 0.1377              |
| 21.5407            | 0.2095              |
| 22.5149            | 0.0087              |
| 24.0765            | 0.2390              |
| 24.7752            | 0.0356              |
| 26.2483            | 0.3555              |
| 28.1815            | 0.2641              |
| 29.5665            | 0.0568              |
| 33.3205            | 0.9899              |
| 35.7203            | 0.6999              |
| 39.6472            | 1.0622              |
| 40.1130            | 0.5036              |
| 40.6537            | 0.3697              |
| 42.8623            | 0.0121              |
| 44.2028            | 0.0561              |
| 47.2267            | 0.0338              |
| 48.5437            | 0.0550              |
| 49.0149            | 0.0820              |
| 55.1550            | 2.3946              |
| 79.1476            | 17.3721             |
| 83.2194            | 0.8117              |
| 86.8500            | 5.0232              |
| 89.1210            | 0.2045              |
| 89.6328            | 4.1266              |
| 96.3821            | 0.5211              |
| 98.5745            | 0.0024              |
| 101.5546           | 1.1483              |
| 102.5852           | 1.2457              |
| 104.4391           | 0.0439              |
| 115.1918           | 0.2658              |
| 115.3307           | 1.0187              |
| 125.6424           | 29.2790             |
| 126.9416           | 0.3295              |
| 129.0153           | 26.8748             |
| 131.2986           | 2.0305              |
| 153.7240           | 5.1506              |

|           |          |
|-----------|----------|
| 154.1747  | 3.8129   |
| 173.3741  | 0.1972   |
| 184.7020  | 5.2801   |
| 185.3107  | 5.5532   |
| 200.2580  | 0.0303   |
| 202.7272  | 0.0148   |
| 214.2534  | 0.0173   |
| 221.5761  | 0.3776   |
| 236.5353  | 19.3928  |
| 240.0268  | 18.3700  |
| 771.3930  | 215.3975 |
| 2230.3139 | 84.9784  |
| 2244.6433 | 103.7592 |
| 2246.4704 | 86.8550  |
| 2248.2101 | 139.1335 |
| 2250.3007 | 49.8193  |
| 2250.4865 | 48.9360  |
| 2252.3056 | 88.5583  |
| 2259.3000 | 149.7070 |
| 2260.0856 | 131.0658 |
| 2262.2574 | 12.2107  |

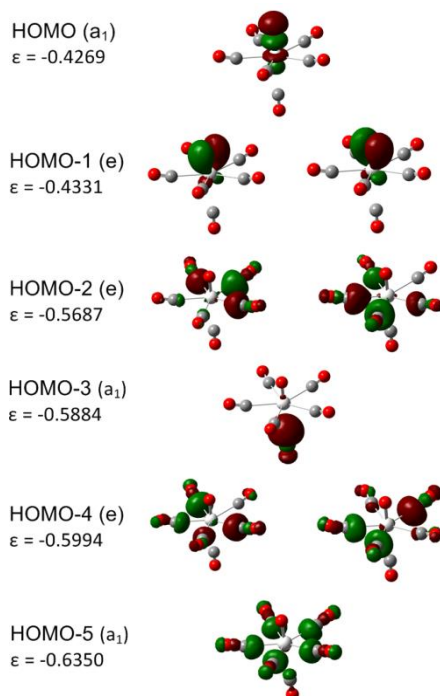

**Fig. S13.** Occupied valence molecular orbitals (isovalue=0.02) of  $\text{ScO}(\text{CO})_6^+$  which display  $\sigma$  and  $\pi$  interactions of Sc-O and Sc-CO. The orbital energy eigenvalues are given in eV.

### Natural Electron Configuration via NBO Analysis

**ScO<sup>+</sup>**      Sc      [core]4s( 0.06)3d( 1.07)4p( 0.01)

**YO<sup>+</sup>**      Y      [core]5s( 0.04)4d( 0.89)5p( 0.02)

**LaO<sup>+</sup>**      La      [core]6s( 0.01)4f( 0.13)5d( 0.81)6p( 0.02)

**LaO(CO)<sub>9</sub><sup>+</sup>**      La      [core]6s( 0.30)4f( 0.21)5d( 1.18)6p( 0.64)5f( 0.02)6d( 0.11)
